# Supplementary material for: Synthesis and reactivity of a heteroleptic magnesium hydride on a dearomatized picolyl-based NNN-chelator
Source: Royal Society of Chemistry journal article supplement (doi:10.1039/d4dt02757d), 2024-01-01
Supplement: d4dt02757d1.pdf [file d4dt02757d1.pdf]

## Supporting Information

### Synthesis and Reactivity of a Heteroleptic Magnesium Hydride on a Dearomatized Picolyl-Based NNN-Chelator.

Chhotan Mandal,<sup>a</sup> Subham Sarkar,<sup>a,b</sup> Sourav Panda,<sup>a</sup> Dibyendu Mallick,<sup>b,\*</sup> and Debabrata Mukherjee<sup>a,\*</sup>

<sup>a</sup> Department of Chemical Sciences, Indian Institute of Science Education and Research Kolkata, Mohanpur, 741246, West Bengal, India

<sup>b</sup> Department of Chemistry, Presidency University, 86/1 College Street, Kolkata, 700073, West Bengal, India.

### Table of Contents

|                                                               |     |
|---------------------------------------------------------------|-----|
| 1. synthesis and characterization of <sup>Mes</sup> <b>LH</b> | S2  |
| 2. Spectroscopic characterization data                        | S6  |
| 3. Crystallographic data                                      | S17 |
| 4. DFT analyses                                               | S22 |
| 5. References                                                 | S41 |

## 1. Synthesis and characterization of <sup>Mes</sup>LH.

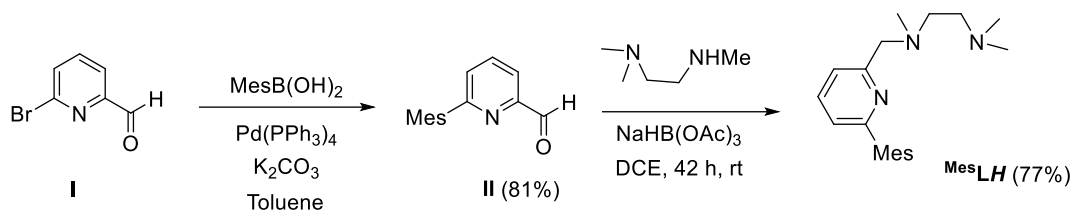

**Scheme S1.** Synthesis of <sup>Mes</sup>LH.

### Step-1

A 250 mL Schlenk flask equipped with a magnetic stir bar was charged with **I** (5.0 g, 26.88 mmol), MesB(OH)<sub>2</sub> (6.61g, 40.32 mmol), K<sub>2</sub>CO<sub>3</sub> (11.14 g, 80.64 mmol), 70 mL toluene, 30 mL ethanol, and 30 mL H<sub>2</sub>O. The mixture was degassed following three freeze-pump-thaw cycle, followed by the addition of 0.912 g of Pd(PPh<sub>3</sub>)<sub>4</sub> (0.79 mmol) and the reaction mixture was degassed again. The reaction mixture was then heated to 120 °C for 48 h under N<sub>2</sub> with constant stirring. Upon cooling back to ambient temperature, the volatiles were removed under reduced pressure. The residue was extracted with ethyl acetate, dried by MgSO<sub>4</sub>, and purified by column chromatography (silica mesh 100-200, EtOAc/hexane = 2/98 (v/v)) to give 4.90 g of **II** (21.76 mmol, 81%).

<sup>1</sup>H NMR (CDCl<sub>3</sub>, 500 MHz): δ 10.13 (s, Ar-CHO), 7.96 (m, 1H, ArH), 7.95 (m, 1H, ArH), 7.49-7.47 (m, 1H, ArH), 6.99 (m, 2H, ArH), 2.35 (s, 3H, <sup>Me</sup>Mes), 2.05 (s, 6H, <sup>Me</sup>Mes). <sup>13</sup>C{<sup>1</sup>H} NMR (CDCl<sub>3</sub>, 126 MHz): δ 194.1, 161.0, 153.0, 138.2, 137.4, 136.7, 135.7, 129.2, 128.7, 119.6, 21.2, 20.3.

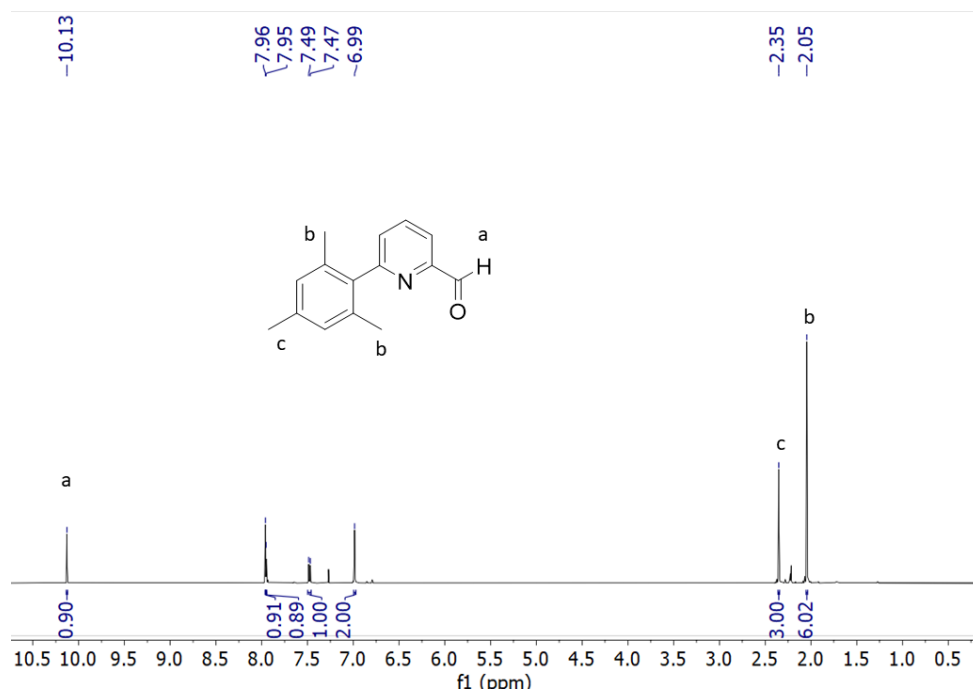

**Figure S1.**  $^1\text{H}$  NMR spectrum of **II** in  $\text{CDCl}_3$ .

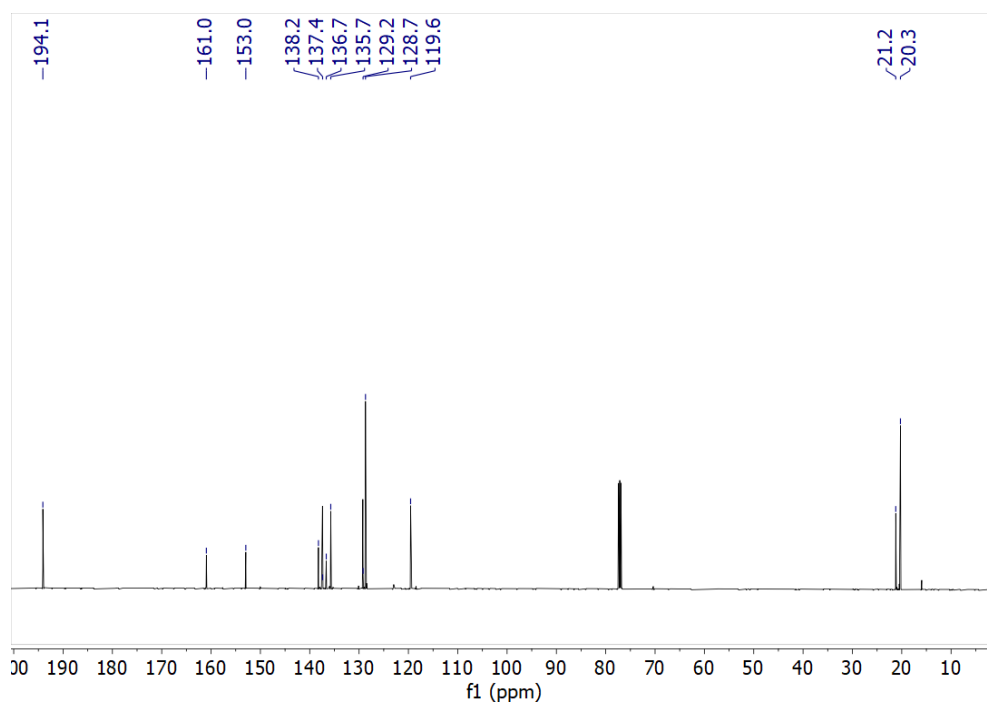

**Figure S2.**  $^{13}\text{C}\{^1\text{H}\}$  NMR spectrum of **II** in  $\text{CDCl}_3$ .

### Step 2.

A 250 mL Schlenk flask equipped with a magnetic stir bar was charged under  $\text{N}_2$  atmosphere with **II** (1.81 g, 8.04 mmol) and  $\text{N,N,N}'$ -trimethylethylenediamine (1.0 mL, 7.7 mmol) in 50 mL of Dry DCE. To this,  $\text{NaHB}(\text{OAc})_3$  (5.11 g, 24.12 mmol) was added slowly under ice cold

condition. The reaction mixture was set for stirring under N<sub>2</sub> atmosphere for 60 hours at room temperature. The reaction mixture was then quenched by a saturated solution of NaHCO<sub>3</sub> the mixture was filtered and the volatiles were removed under reduced pressure. The residue was then extracted with EtOAc, dried by MgSO<sub>4</sub>, and subsequently purified by column chromatography (silica mesh 60-120, MeOH/DCM = 5/95 (v/v)) to give 1.92 g of pure <sup>Mes</sup>LH (6.164 mmol, 77%).

<sup>1</sup>H NMR (CDCl<sub>3</sub>, 500 MHz): δ 7.7 (t, <sup>3</sup>J<sub>HH</sub> = 7.5 Hz, 1H, ArH), 7.41 (d, <sup>3</sup>J<sub>HH</sub> = 7.5 Hz, 1H, ArH), 7.07 (d, <sup>3</sup>J<sub>HH</sub> = 7.5 Hz, 1H, ArH), 6.91 (m, 2H, ArH), 3.74 (s, 2H, picolyl-CH<sub>2</sub>), 2.59 (t, <sup>3</sup>J<sub>HH</sub> = 7.5 Hz, 2H, CH<sub>2</sub>), 2.48 (t, <sup>3</sup>J<sub>HH</sub> = 6.0 Hz, 2H, CH<sub>2</sub>), 2.31 (d, <sup>3</sup>J<sub>HH</sub> = 7.5 Hz, 6H, Me), 2.23 (s, 6H, Me), 2.0 (s, 6H, Me). <sup>13</sup>C{<sup>1</sup>H} NMR (CDCl<sub>3</sub>, 126 MHz): δ 159.3, 159.2, 137.9, 137.4, 136.7, 135.7, 129.0, 128.4, 123.0, 121.2, 64.5, 57.4, 55.4, 45.7, 42.8, 21.1, 20.2. HRMS-(m/z): [M+nH] calc. for [C<sub>20</sub>H<sub>29</sub>N<sub>3</sub>], 311.2361, Found 312.2417.

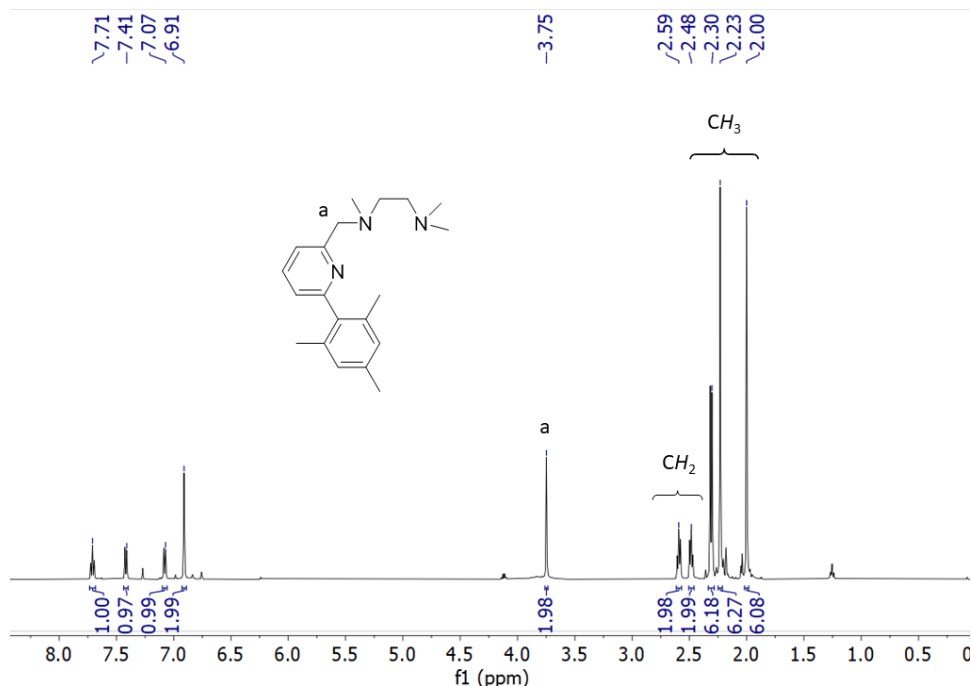

**Figure S3.** <sup>1</sup>H NMR spectrum of <sup>Mes</sup>LH in CDCl<sub>3</sub>.

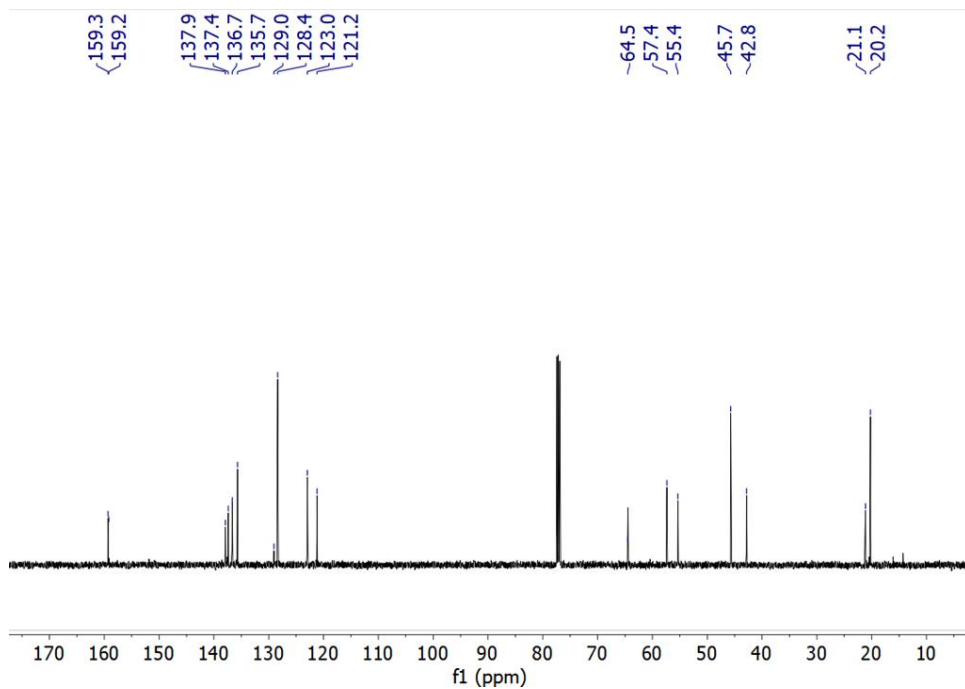

**Figure S4.**  $^{13}\text{C}\{^1\text{H}\}$  NMR of  $\text{MesLH}$  in  $\text{CDCl}_3$ .

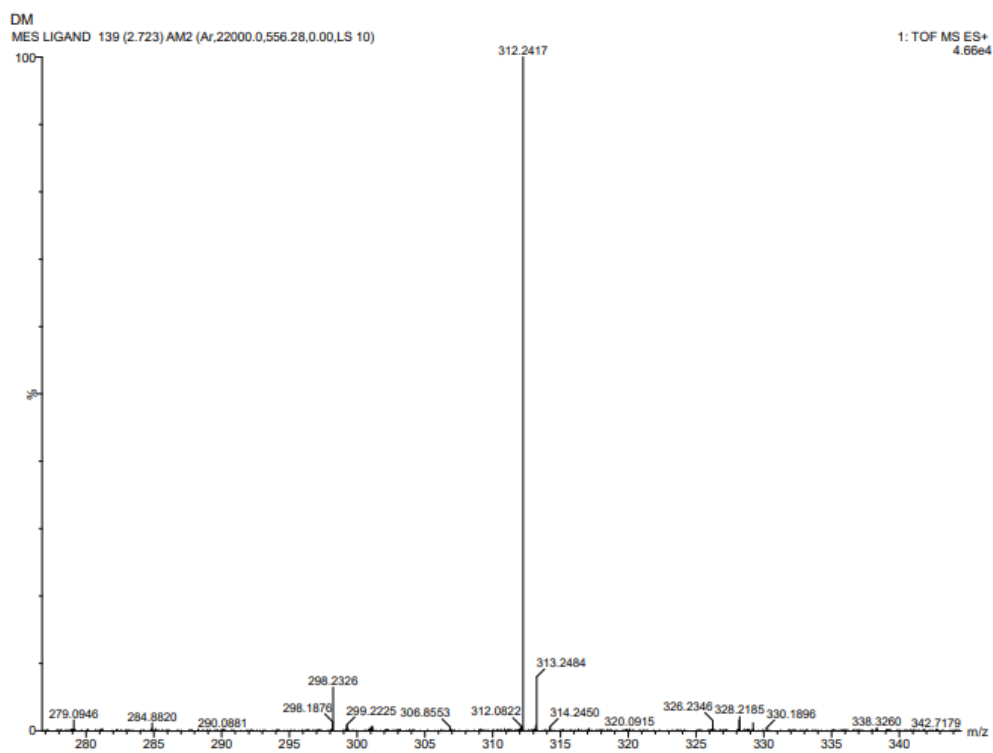

**Figure S5.** HRMS data of  $\text{MesLH}$ .

## 2. Spectroscopic characterization data.

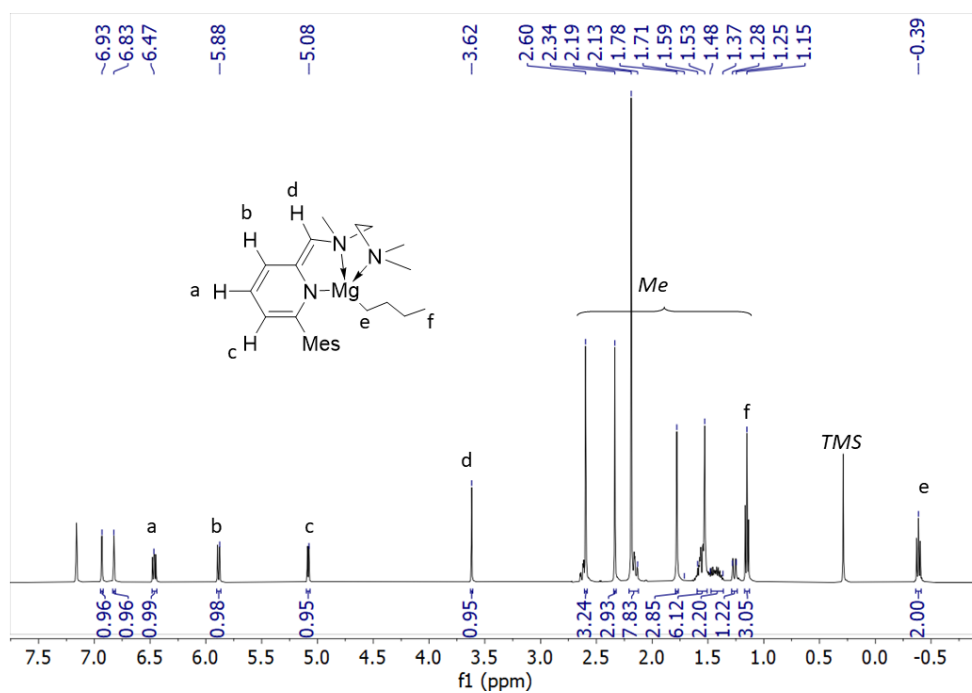

**Figure S6.**  $^1\text{H}$  NMR spectrum of **1** in  $\text{C}_6\text{D}_6$ .

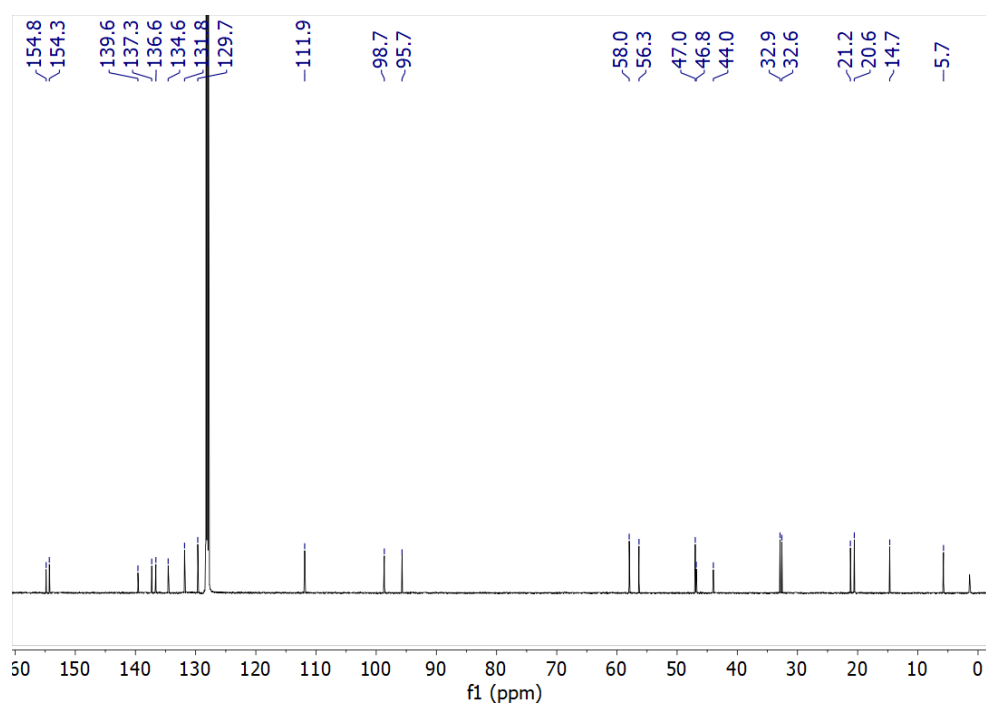

**Figure S7.**  $^{13}\text{C}\{^1\text{H}\}$  NMR spectrum of **1** in  $\text{C}_6\text{D}_6$ .

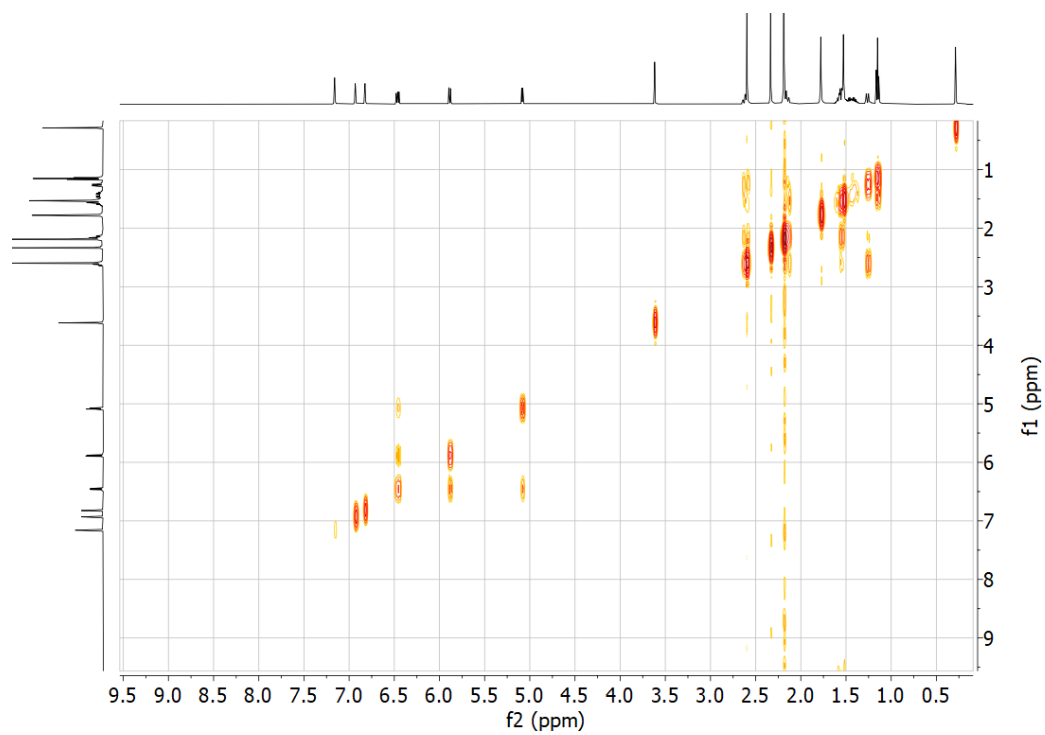

**Figure S8.**  $^1\text{H}$ - $^1\text{H}$  COSY NMR spectrum of **1** in  $\text{C}_6\text{D}_6$ .

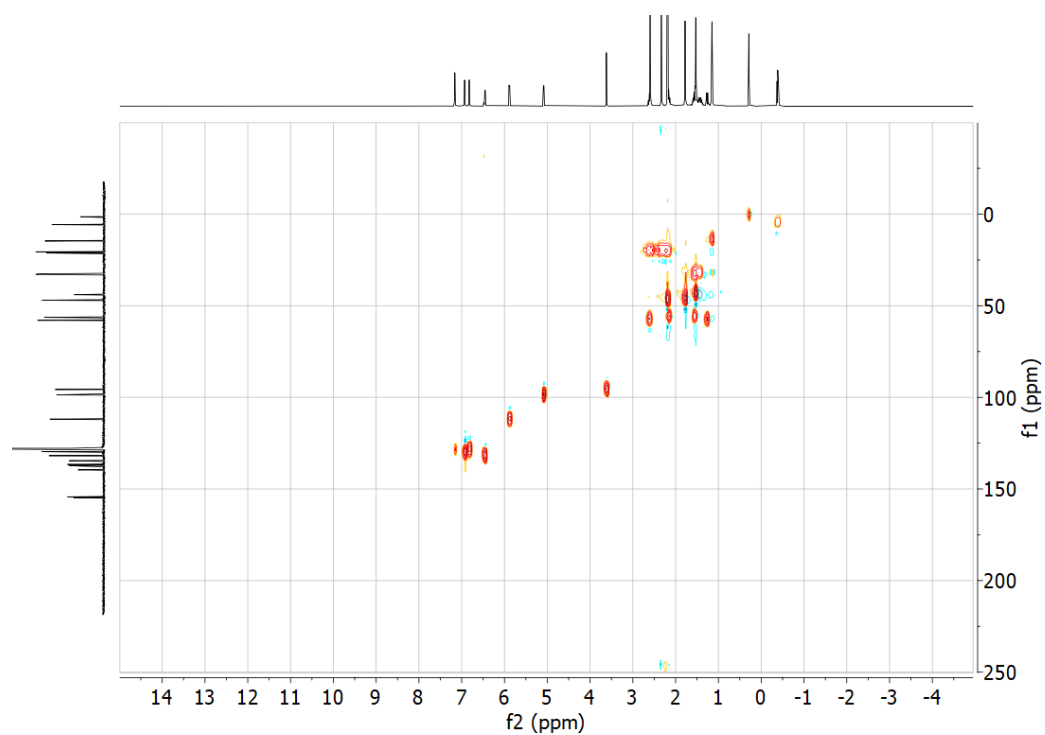

**Figure S9.**  $^1\text{H}$ - $^{13}\text{C}$  HSQC NMR spectrum of **1** in  $\text{C}_6\text{D}_6$ .

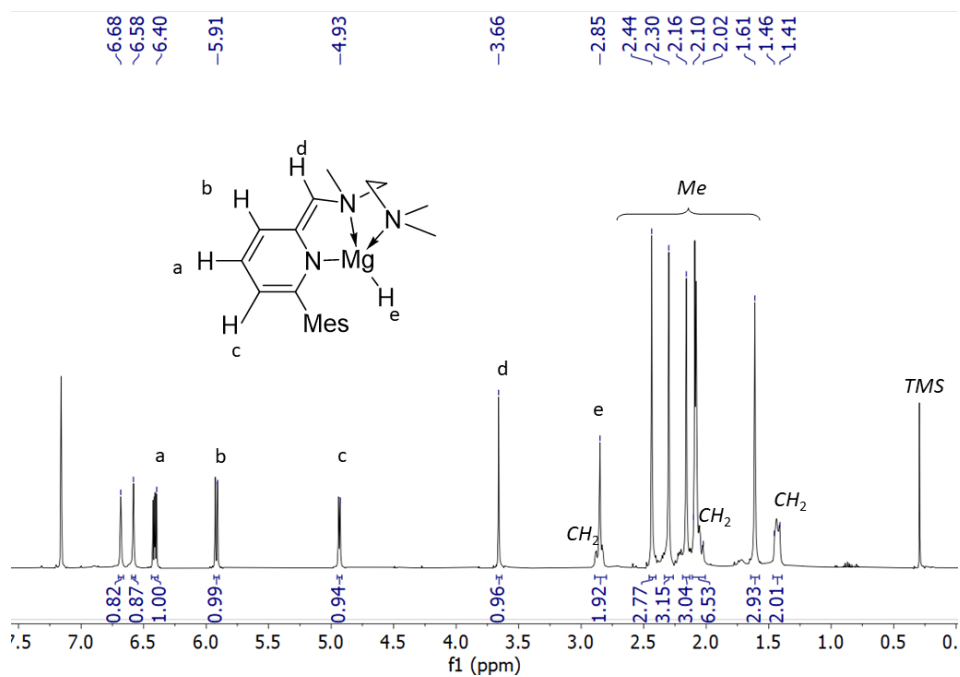

**Figure S10.**  $^1\text{H}$  NMR spectrum of **22** in  $\text{C}_6\text{D}_6$ . The monomeric form is shown in the picture for peak assignment.

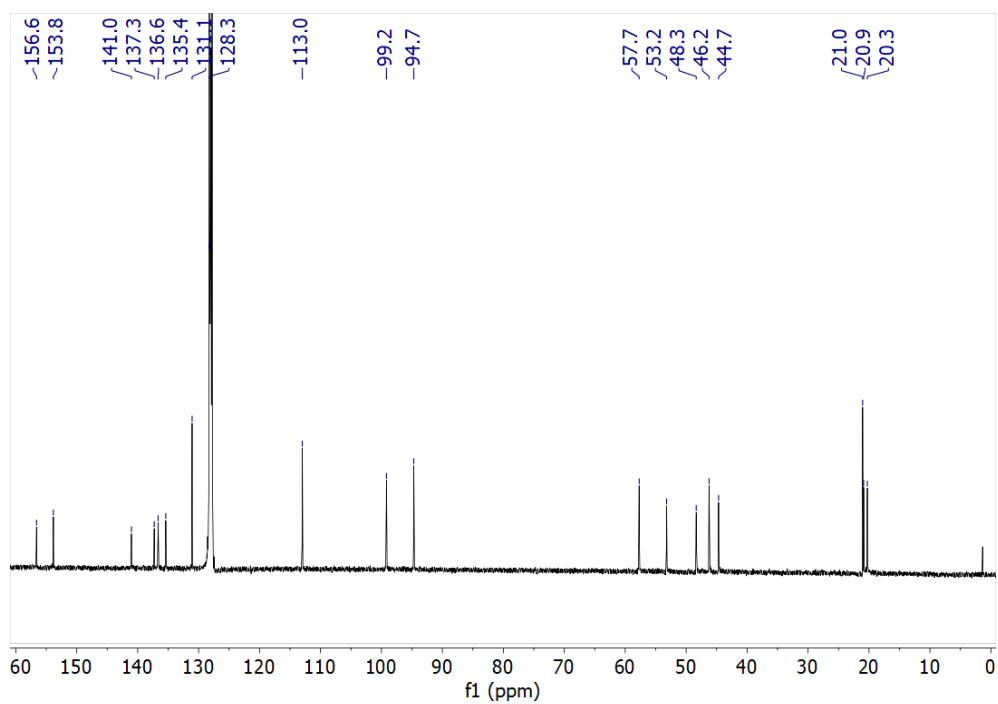

**Figure S11.**  $^{13}\text{C}\{^1\text{H}\}$  NMR spectrum of **22** in  $\text{C}_6\text{D}_6$ .



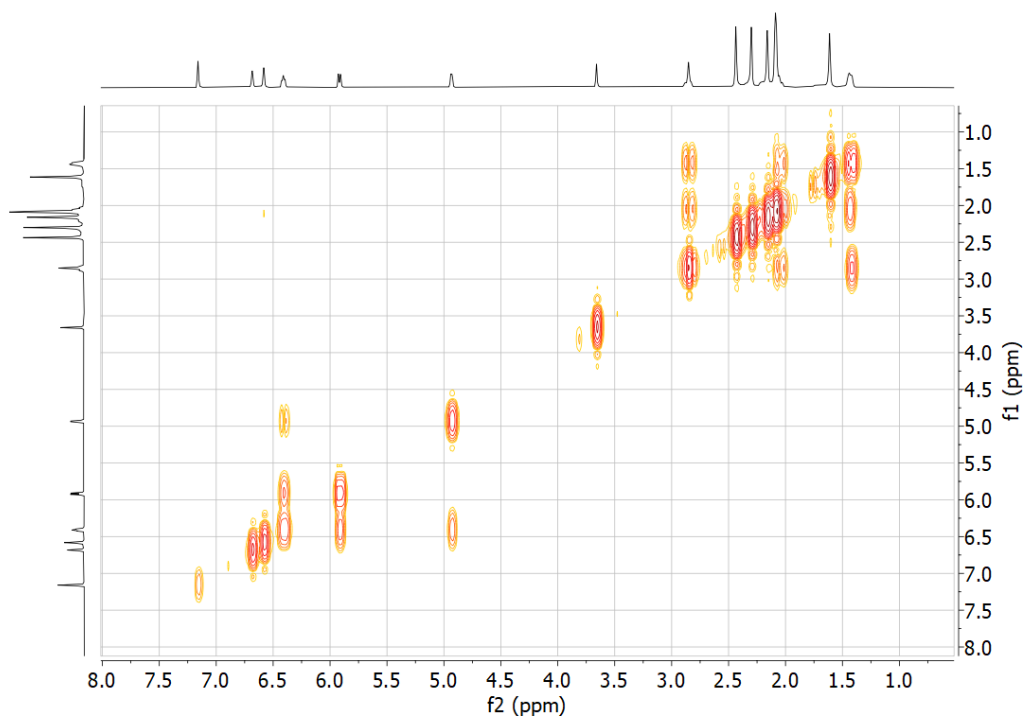

**Figure S12.**  $^1\text{H}$ - $^1\text{H}$  COSY NMR spectrum of **22** in  $\text{C}_6\text{D}_6$ .

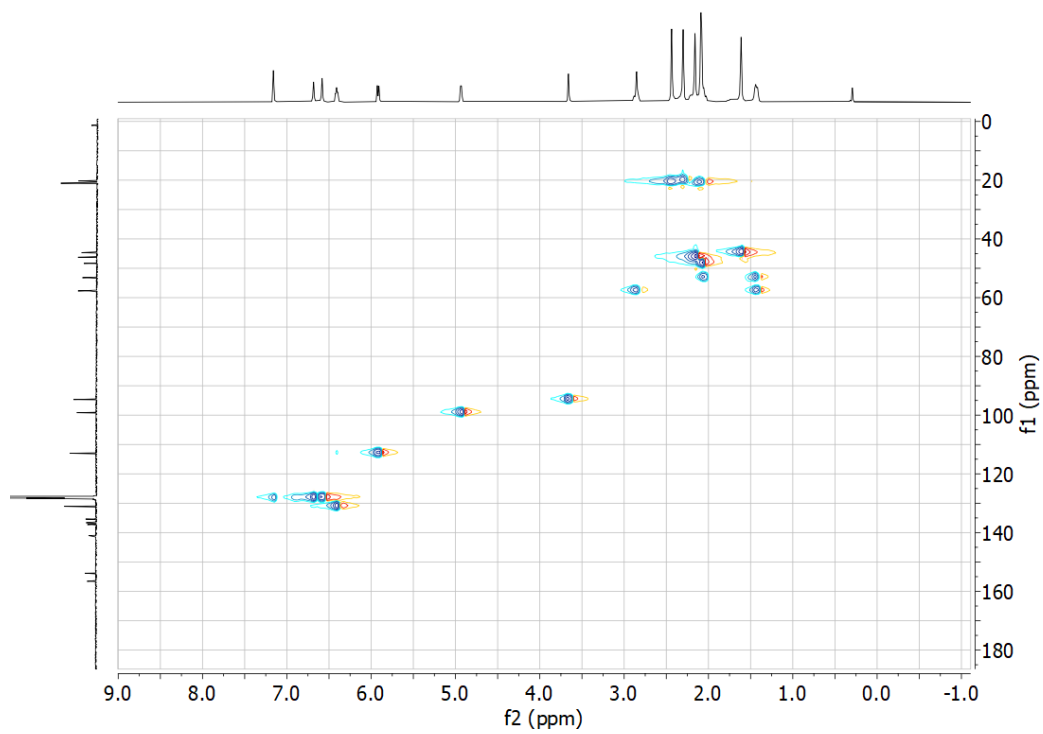

**Figure S13.**  $^1\text{H}$ - $^{13}\text{C}$  HSQC NMR spectrum of **22** in  $\text{C}_6\text{D}_6$ .

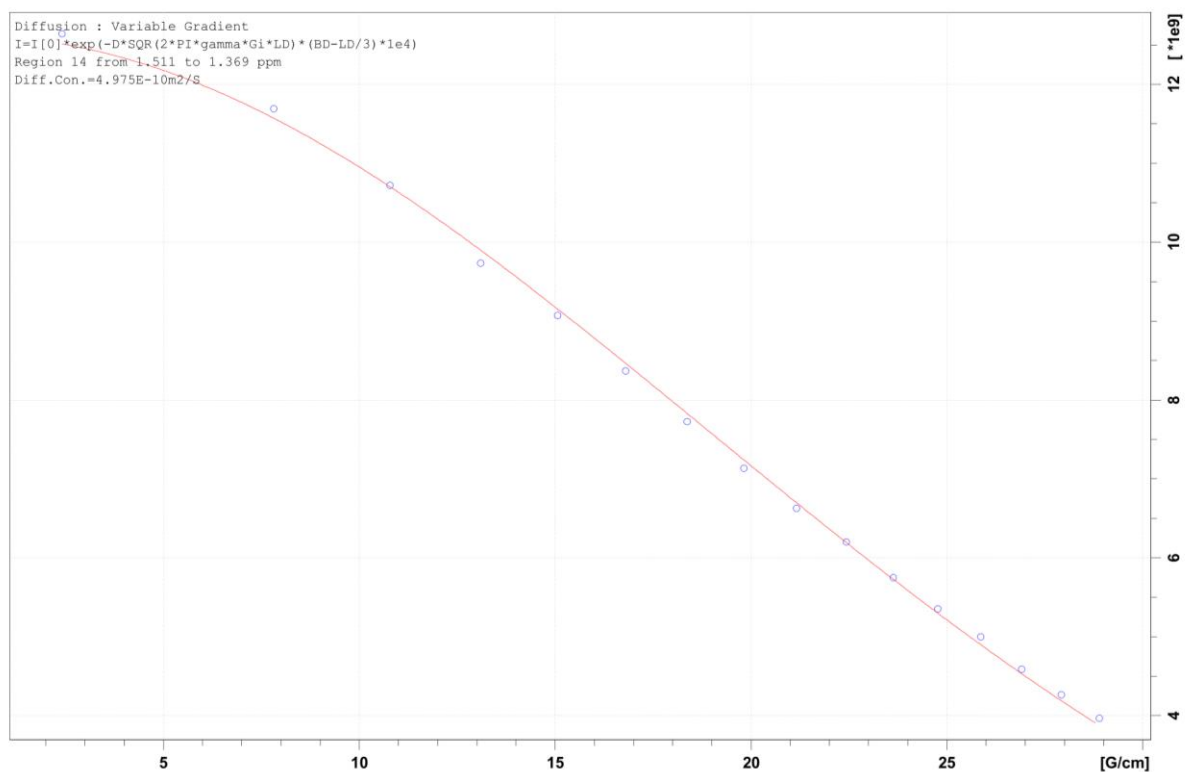

$$r = \frac{kT}{6\pi\eta D}$$

$$= \frac{1.3806488 \cdot 10^{-23} \cdot 300}{6 \cdot \frac{22}{7} \cdot 596.2 \cdot 10^{-6} \cdot 4.975 \cdot 10^{-10}} \text{ m}$$

$$= 7.40 \cdot 10^{-10} \text{ m} = 7.40 \text{ \AA}$$

For the dimeric **22**, the crystallographic diameter is estimated as 14.14 Å. That makes the approximated radius value as ~ 7.07 Å, which is close to what is found through the DOSY analysis.

**Figure S14.** DOSY analysis of **22** in C<sub>6</sub>D<sub>6</sub>.

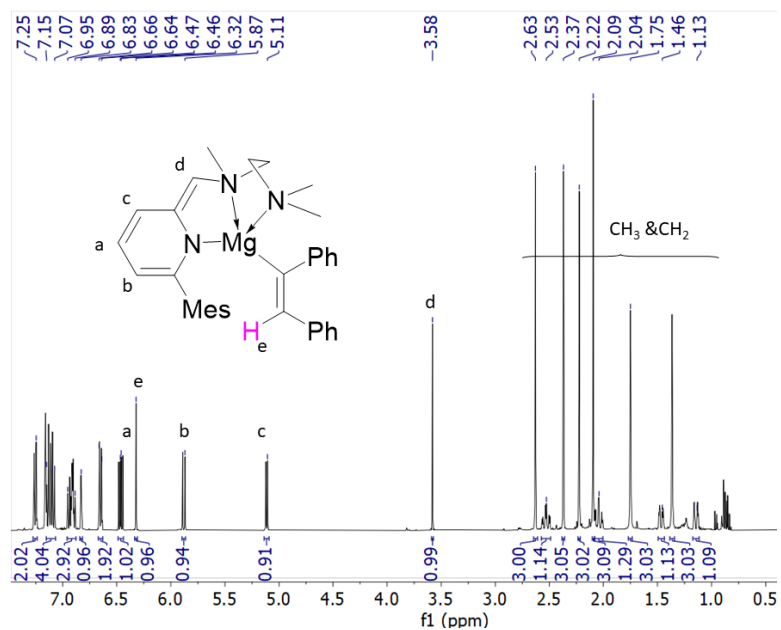

**Figure S15.**  $^1\text{H}$  NMR spectrum of **3** in  $\text{C}_6\text{D}_6$ .

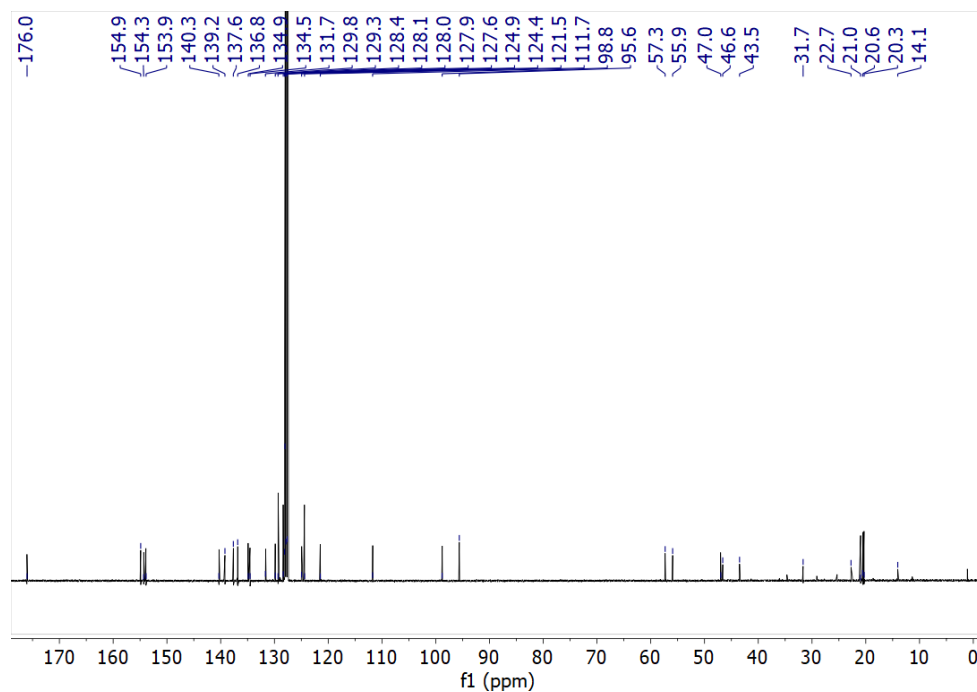

**Figure S16.**  $^{13}\text{C}\{^1\text{H}\}$  NMR spectrum of **3** in  $\text{C}_6\text{D}_6$ .

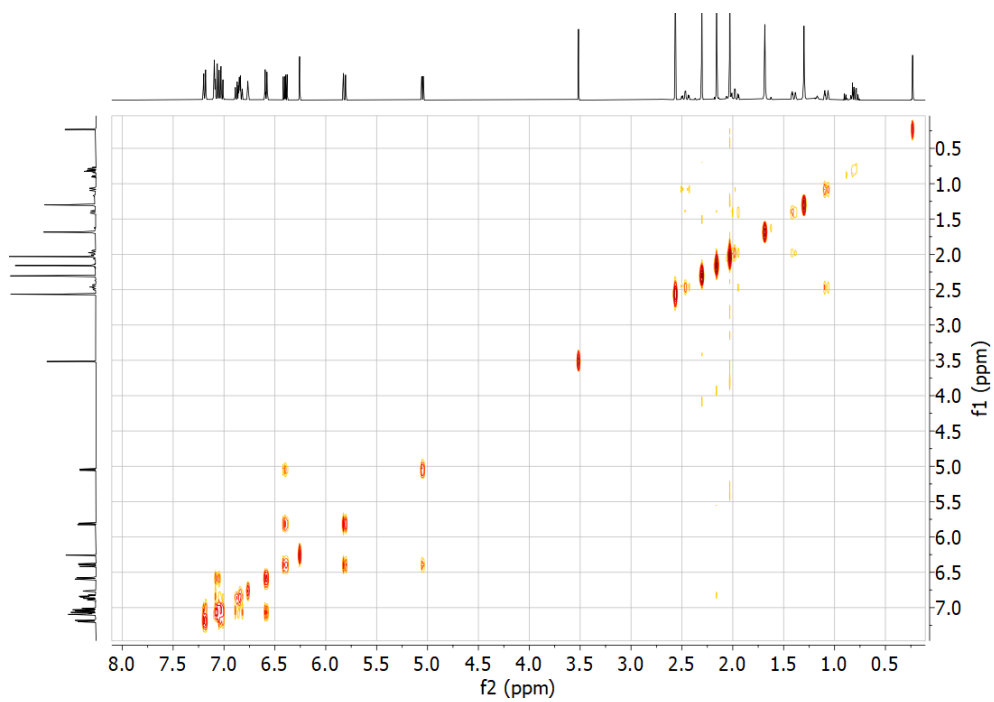

**Figure S17.**  $^1\text{H}$ - $^1\text{H}$  COSY NMR spectrum of **3** in  $\text{C}_6\text{D}_6$ .

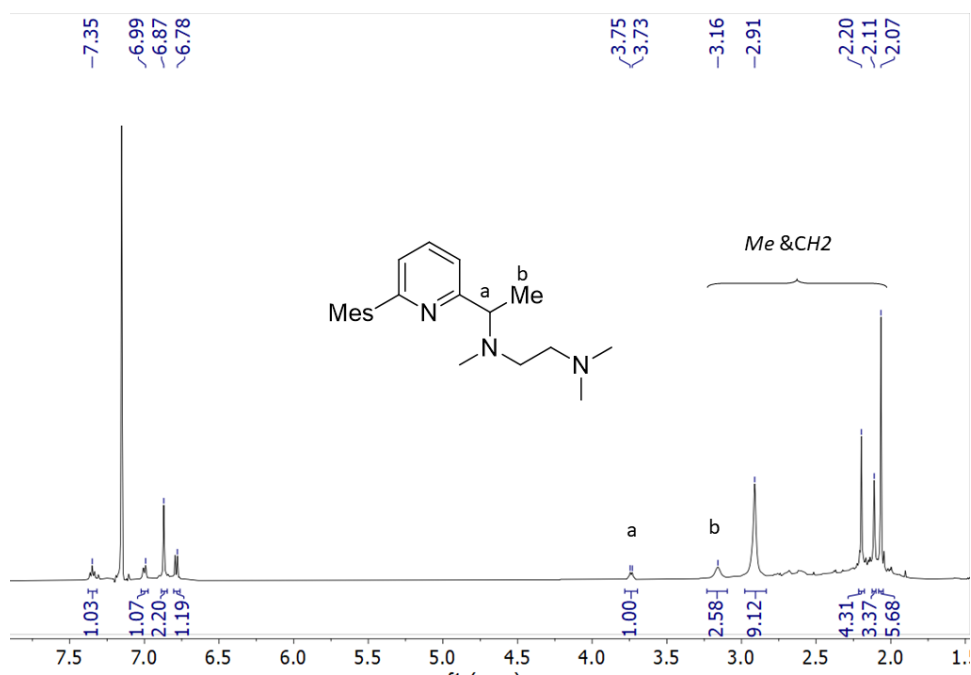

**Figure S18.**  $^1\text{H}$  NMR spectrum of  $(\text{MesLMe})\text{H}$  in  $\text{C}_6\text{D}_6$ .

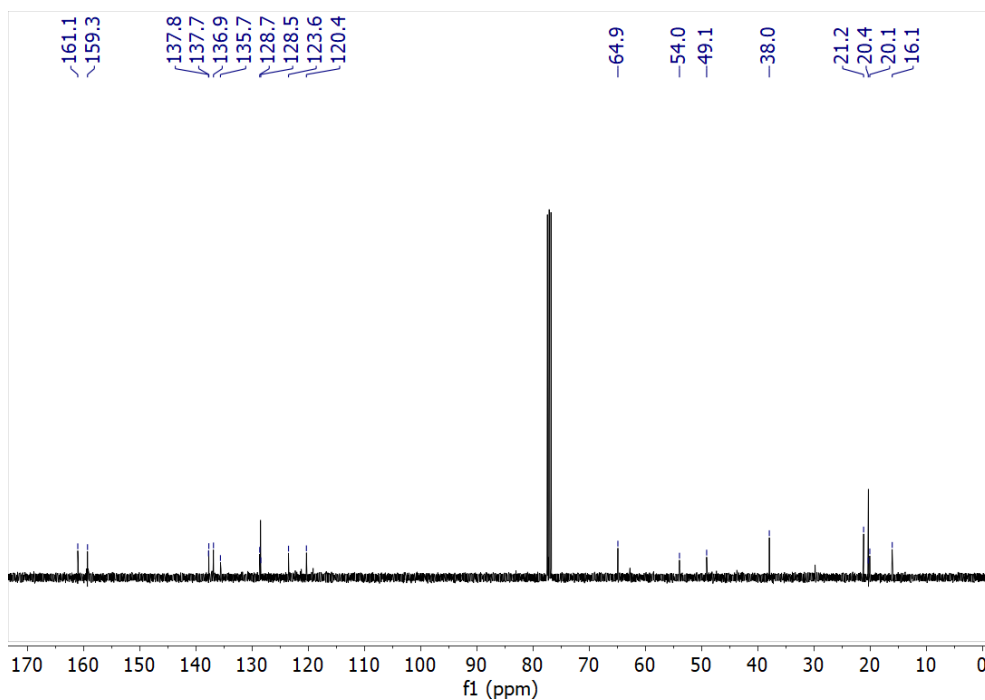

Figure S19.  $^{13}\text{C}\{^1\text{H}\}$  NMR spectrum of  $(^{\text{Mes}}\text{L}^{\text{Me}})\text{H}$  in  $\text{CDCl}_3$ .

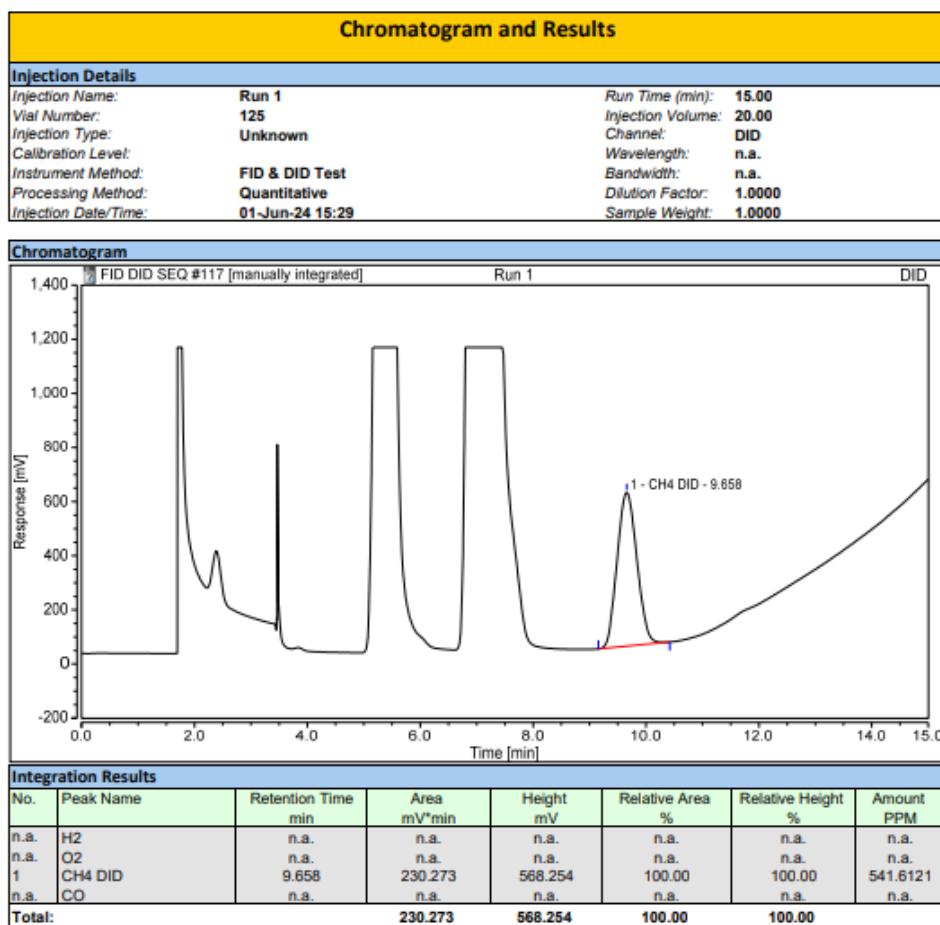

Figure S20. GC-TCD data of  $\text{CH}_4$  gas detection.

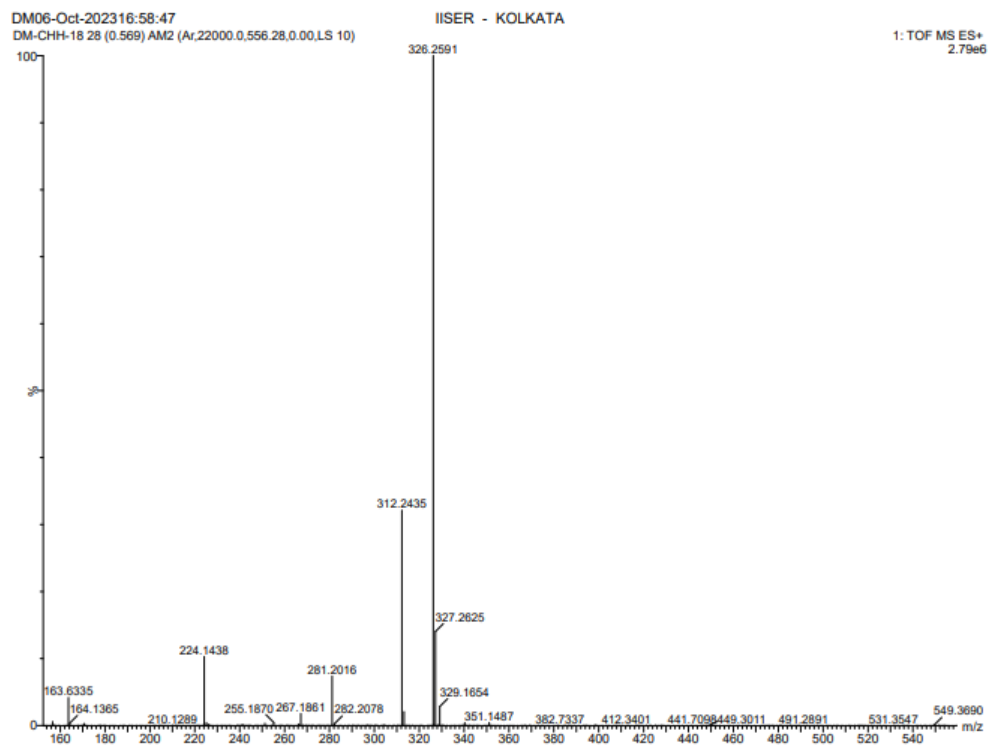

**Figure S21.** HRMS data of  $(^{\text{Mes}}\text{L}^{\text{Me}})\text{H}$ .

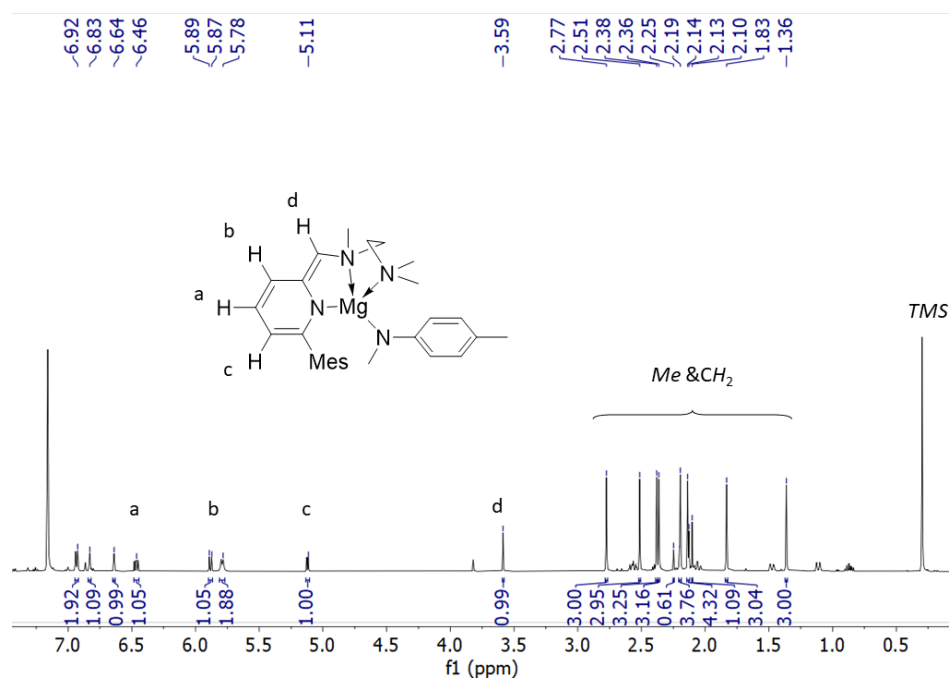

**Figure S22.**  $^1\text{H}$  NMR spectrum of **4** in  $\text{C}_6\text{D}_6$ .

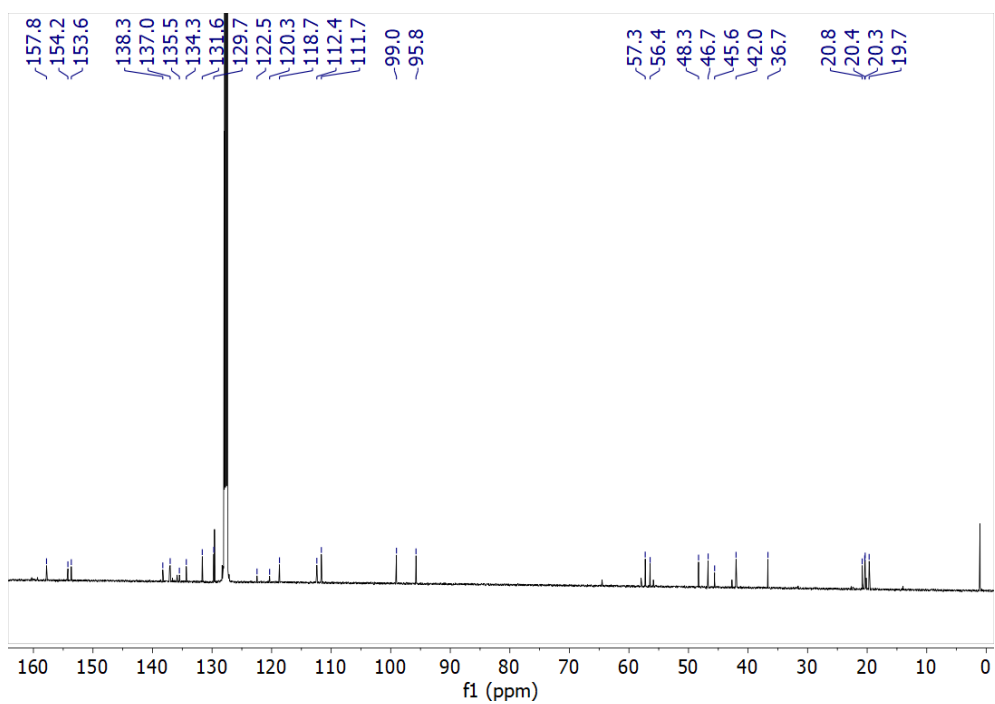

**Figure S23.**  $^{13}\text{C}\{^1\text{H}\}$  NMR spectrum of **4** in  $\text{C}_6\text{D}_6$ .

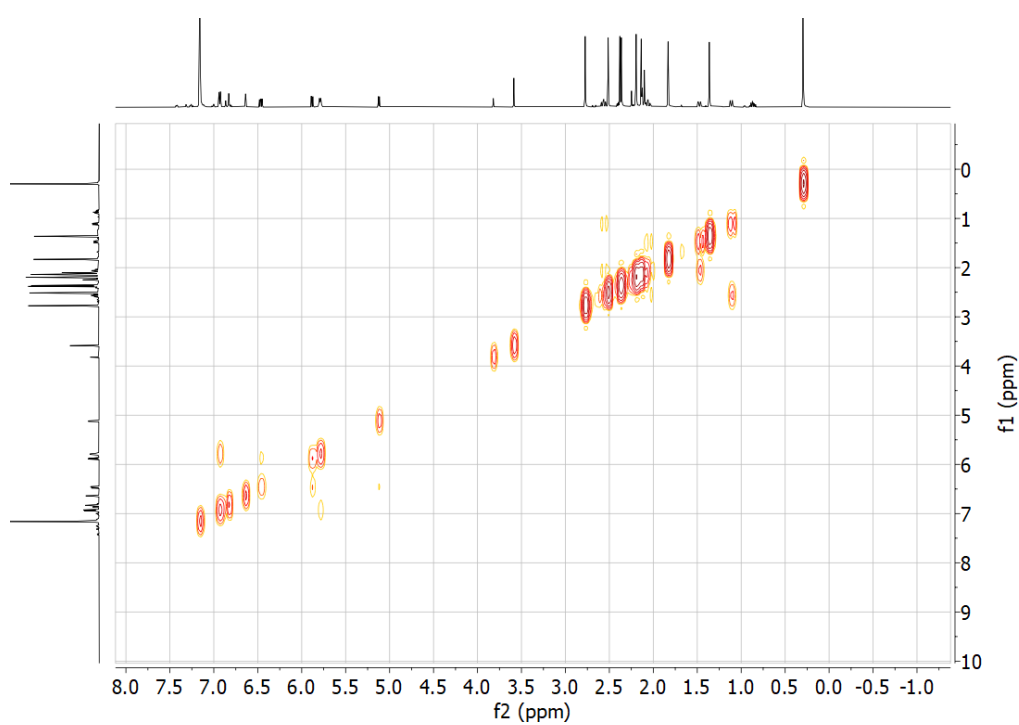

**Figure S24.**  $^1\text{H}$ - $^1\text{H}$  COSY NMR spectrum of **4** in  $\text{C}_6\text{D}_6$ .

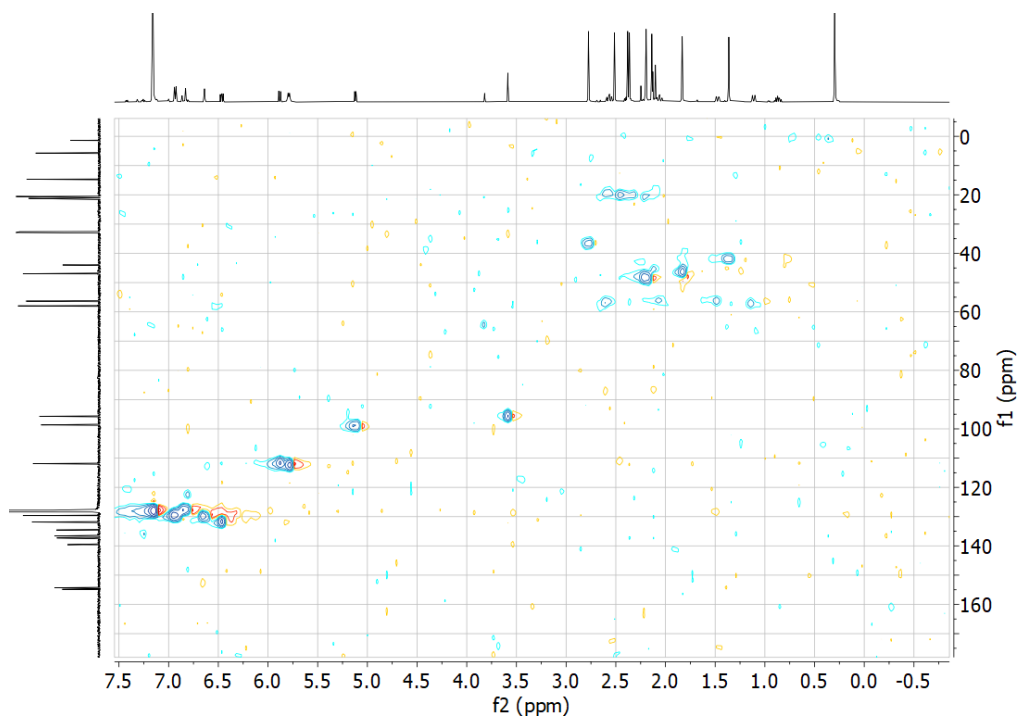

**Figure S25.**  $^1\text{H}$ - $^{13}\text{C}$  HSQC NMR spectrum of **4** in  $\text{C}_6\text{D}_6$ .

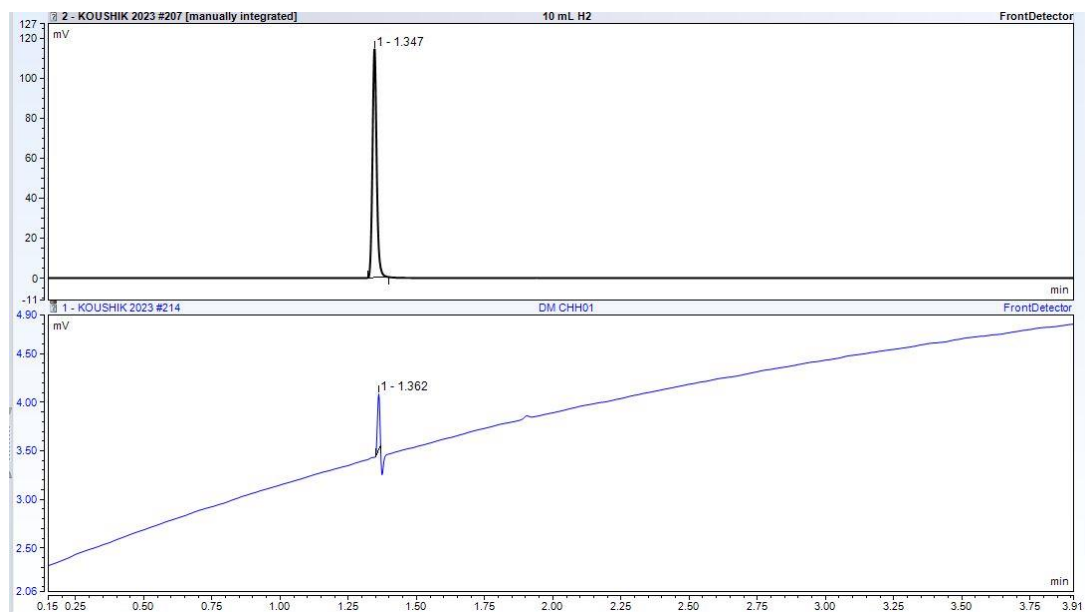

**Figure S26.** GC-TCD data of  $\text{H}_2$  gas detection.



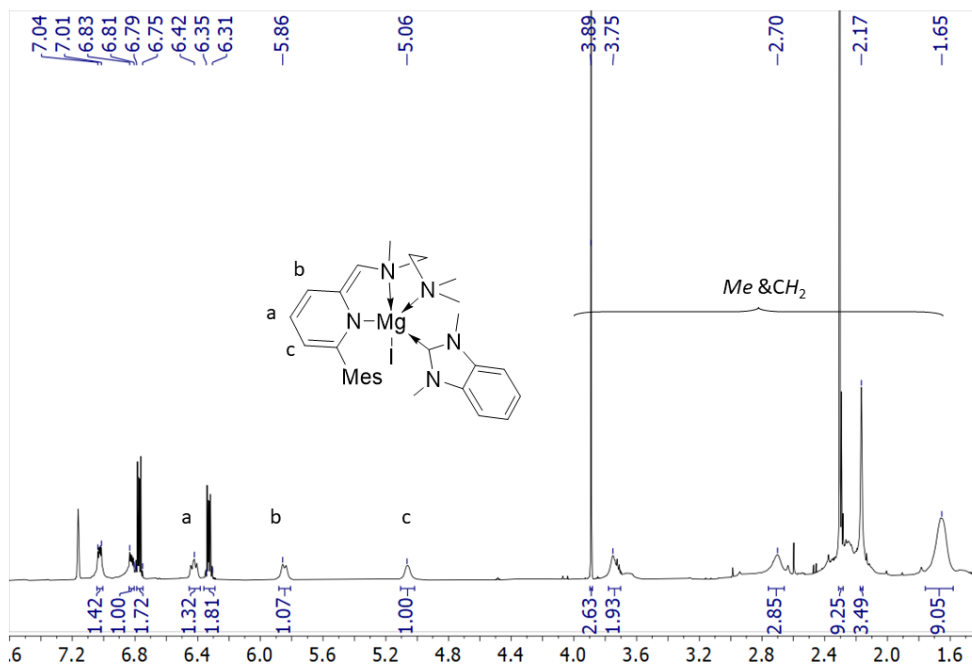

**Figure S27.**  $^1\text{H}$  NMR spectrum of **5** in  $\text{C}_6\text{D}_6$ .

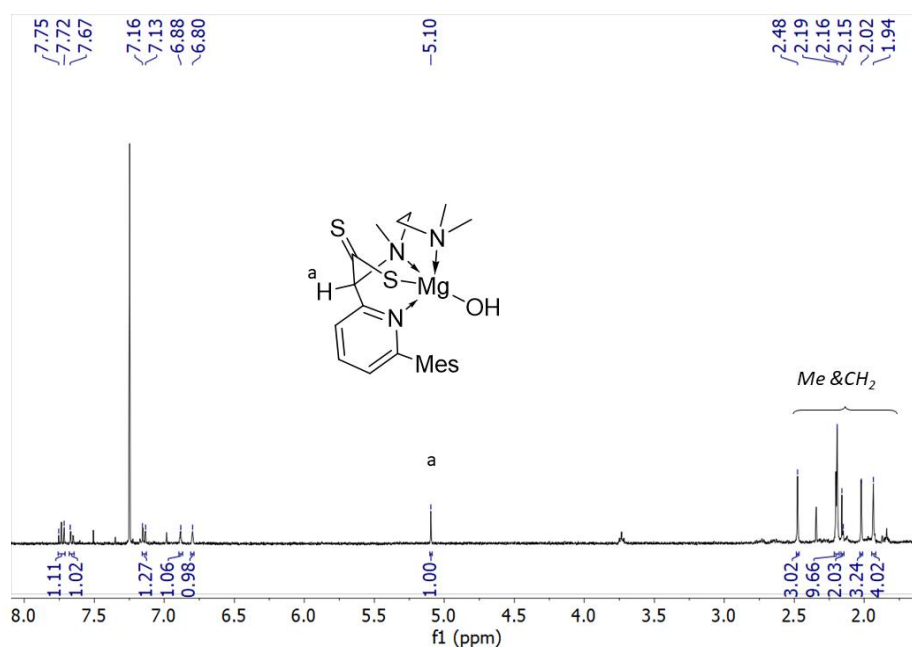

**Figure S28.**  $^1\text{H}$  NMR spectrum of **62** in  $\text{CDCl}_3$ . The monomeric form is shown in the picture for peak assignment.

### 3. Crystallographic Data.

X-ray diffraction data were collected on a Rigaku XtaLAB Synergy, Dualflex four-circle diffractometer with HyPix3000 detector and  $\text{Cu-K}\alpha$  radiation for all. Measurements were

carried out at 100 K for all the compounds. The structures were solved by intrinsic phasing using SHELXT.<sup>1</sup> all refinements were carried out against  $F^2$  with ShelXL<sup>2</sup> as implemented in the program system Olex2.<sup>3</sup> The non-hydrogen atoms were refined with anisotropic displacement parameters. All hydrogen atoms were included in calculated positions and treated as riding throughout the refinement. Potential solvent accessible area or void space was calculated using PLATON<sup>4</sup> executable in Olex2. Graphical representations were performed with the program DIAMOND.<sup>5</sup> The crystallographic data can be obtained free of charge from the Crystallographic Data Centre via [www.ccdc.cam.ac.uk/data\\_request/cif](http://www.ccdc.cam.ac.uk/data_request/cif) using the CCDC numbers (given in the tables S1 and S2) as reference.

**Table S1: Crystallographic data of 1, 2, and 3.**

|                                                 | <b>1</b>                                         | <b>2<sub>2</sub></b>                                           | <b>4</b>                                           |
|-------------------------------------------------|--------------------------------------------------|----------------------------------------------------------------|----------------------------------------------------|
| formula                                         | C <sub>24</sub> H <sub>37</sub> MgN <sub>3</sub> | C <sub>40</sub> H <sub>58</sub> Mg <sub>2</sub> N <sub>6</sub> | C <sub>31.5</sub> H <sub>42</sub> MgN <sub>4</sub> |
| <i>F<sub>w</sub></i> / g mol <sup>-1</sup>      | 391.87                                           | 671.557                                                        | 501.017                                            |
| cryst. color, habit                             | Red                                              | Red                                                            | Red                                                |
| crystal size / mm <sup>3</sup>                  | 0.164 × 0.142 × 0.124                            | 0.24 × 0.22 × 0.14                                             | 0.4 × 0.32 × 0.18                                  |
| crystal system                                  | monoclinic                                       | orthorhombic                                                   | monoclinic                                         |
| space group                                     | P2 <sub>1</sub> /n                               | Pbca                                                           | P2 <sub>1</sub> /c                                 |
| <i>a</i> / Å                                    | 12.2110(3)                                       | 14.1364(2)                                                     | 14.6445(2)                                         |
| <i>b</i> / Å                                    | 11.1972(3)                                       | 15.1179(2)                                                     | 11.4598(1)                                         |
| <i>c</i> / Å                                    | 17.5444(5)                                       | 18.5001(2)                                                     | 18.6091(2)                                         |
| $\alpha$ / °                                    | 90                                               | 90                                                             | 90                                                 |
| $\beta$ / °                                     | 103.866(3)                                       | 90                                                             | 111.524((1)                                        |
| $\gamma$ / °                                    | 90                                               | 90                                                             | 90                                                 |
| <i>V</i> / Å <sup>3</sup>                       | 2328.92(11)                                      | 3953.71(9)                                                     | 2905.25(6)                                         |
| <i>Z</i>                                        | 4                                                | 4                                                              | 4                                                  |
| <i>d</i> <sub>calc</sub> / Mg · m <sup>-3</sup> | 1.118                                            | 1.128                                                          | 1.145                                              |
| $\mu$ / mm <sup>-1</sup>                        | 0.740 (CuK $\alpha$ )                            | 0.798 (CuK $\alpha$ )                                          | 0.711(CuK $\alpha$ )                               |
| <i>F</i> (000)                                  | 856.0                                            | 1461.3                                                         | 1087.7                                             |
| $2\theta$ range / °                             | 8.0 to 136.742                                   | 9.56 to 136.48                                                 | 6.48 to 136.3                                      |

|                                           |                                                               |                                                               |                                                               |
|-------------------------------------------|---------------------------------------------------------------|---------------------------------------------------------------|---------------------------------------------------------------|
| index ranges                              | $-14 \leq h \leq 14, -13 \leq k \leq 13, -17 \leq l \leq 21$  | $-16 \leq h \leq 17, -17 \leq k \leq 18, -22 \leq l \leq 22$  | $-17 \leq h \leq 17, -13 \leq k \leq 13, -20 \leq l \leq 22$  |
| Reflections collected                     | 23984                                                         | 47379                                                         | 32463                                                         |
| independ.reflns ( $R_{\text{int}}$ )      | 4230 [ $R_{\text{int}} = 0.0735, R_{\text{sigma}} = 0.0351$ ] | 3601 [ $R_{\text{int}} = 0.0340, R_{\text{sigma}} = 0.0167$ ] | 5281 [ $R_{\text{int}} = 0.0494, R_{\text{sigma}} = 0.0253$ ] |
| observed reflns                           | 12024                                                         | 21729                                                         | 20415                                                         |
| data/restr./param.                        | 4230/0/260                                                    | 3601/0/331                                                    | 5281/303/456                                                  |
| $R_1, wR_2 [I > 2\sigma(I)]$              | $R_1 = 0.0675, wR_2 = 0.1857$                                 | $R_1 = 0.0341, wR_2 = 0.0832$                                 | $R_1 = 0.0442, wR_2 = 0.1187$                                 |
| $R_1, wR_2$ (all data)                    | $R_1 = 0.0739, wR_2 = 0.1952$                                 | $R_1 = 0.0383, wR_2 = 0.0834$                                 | $R_1 = 0.0492, wR_2 = 0.1224$                                 |
| GooF-of-fit on $F^2$                      | 1.037                                                         | 1.080                                                         | 1.044                                                         |
| largest diff. peak, hole/ $e\text{\AA}^3$ | 0.74/-0.43                                                    | 0.28/-0.17                                                    | 0.41/-0.30                                                    |
| CCDC number                               | 2313143                                                       | 2313144                                                       | 2313152                                                       |

**Table S2: Crystallographic data of 5 and 6.**

|                                                 | <b>5</b>                                          | <b>6<sub>2</sub></b>                                                             |
|-------------------------------------------------|---------------------------------------------------|----------------------------------------------------------------------------------|
| formula                                         | $\text{C}_{33}\text{H}_{46}\text{IMgN}_5\text{O}$ | $\text{C}_{58.06}\text{H}_{77.94}\text{Mg}_2\text{N}_6\text{O}_{2.97}\text{S}_4$ |
| $F_w / \text{g}\cdot\text{mol}^{-1}$            | 679.976                                           | 1084.359                                                                         |
| cryst. color, habit                             | Red                                               | Clear Colourless                                                                 |
| crystal size / $\text{mm}^3$                    | 0.168 × 0.148 × 0.128                             | 0.146 × 0.126 × 0.118                                                            |
| crystal system                                  | monoclinic                                        | triclinic                                                                        |
| space group                                     | $P2_1/n$                                          | $P-1$                                                                            |
| $a / \text{\AA}$                                | 11.2666(2)                                        | 8.9855(2)                                                                        |
| $b / \text{\AA}$                                | 21.1640(3)                                        | 13.0705(2)                                                                       |
| $c / \text{\AA}$                                | 15.6557(2)                                        | 13.5358(2)                                                                       |
| $\alpha / ^\circ$                               | 90                                                | 111.931(2)                                                                       |
| $\beta / ^\circ$                                | 106.939(2)                                        | 91.736(1)                                                                        |
| $\gamma / ^\circ$                               | 90                                                | 100.183(2)                                                                       |
| $V / \text{\AA}^3$                              | 3571.09(10)                                       | 1443.34(5)                                                                       |
| Z                                               | 4                                                 | 1                                                                                |
| $d_{\text{calc}} / \text{Mg}\cdot\text{m}^{-3}$ | 1.265                                             | 1.248                                                                            |
| $\mu / \text{mm}^{-1}$                          | 7.447 (CuK $\alpha$ )                             | 2.100 (CuK $\alpha$ )                                                            |

|                                                  |                                                               |                                                               |
|--------------------------------------------------|---------------------------------------------------------------|---------------------------------------------------------------|
| $F(000)$                                         | 1413.2                                                        | 583.3                                                         |
| $2\theta$ range / °                              | 7.24 to 136.66                                                | 11.24 to 136.432                                              |
| index ranges                                     | $-10 \leq h \leq 13, -25 \leq k \leq 25, -18 \leq l \leq 18$  | $-10 \leq h \leq 9, -15 \leq k \leq 15, -16 \leq l \leq 16$   |
| Reflections collected                            | 42246                                                         | 28990                                                         |
| independ.reflns ( $R_{\text{int}}$ )             | 6464 [ $R_{\text{int}} = 0.0465, R_{\text{sigma}} = 0.0219$ ] | 5241 [ $R_{\text{int}} = 0.0439, R_{\text{sigma}} = 0.0273$ ] |
| observed reflns                                  | 22983                                                         | 17100                                                         |
| data/restr./param.                               | 6464/0/333                                                    | 5241/153/417                                                  |
| $R_1, wR_2 [I > 2\sigma(I)]$                     | $R_1 = 0.0522, wR_2 = 0.1437$                                 | $R_1 = 0.0448, wR_2 = 0.1216$                                 |
| $R_1, wR_2$ (all data)                           | $R_1 = 0.0582, wR_2 = 0.1545$                                 | $R_1 = 0.0487, wR_2 = 0.1250$                                 |
| GooF-of-fit on $F^2$                             | 1.037                                                         | 1.070                                                         |
| largest diff. peak, hole/ $e \cdot \text{\AA}^3$ | 2.04/-0.47                                                    | 0.56/-0.38                                                    |
| CCDC number                                      | 2313153                                                       | 2313150                                                       |

**Table S3: Crystallographic data of 3.**

|                                        | <b>3</b>                                               |
|----------------------------------------|--------------------------------------------------------|
| formula                                | $\text{C}_{136}\text{H}_{156}\text{Mg}_4\text{N}_{12}$ |
| $F_w / \text{g} \cdot \text{mol}^{-1}$ | 2062.23                                                |
| cryst. color, habit                    | reddish                                                |
| crystal size / $\text{mm}^3$           | $0.0148 \times 0.0136 \times 0.0125$                   |
| crystal system                         | orthorhombic                                           |
| space group                            | $\text{Pca}2_1$                                        |
| $a / \text{\AA}$                       | 30.5242(3)                                             |
| $b / \text{\AA}$                       | 9.16760(10)                                            |
| $c / \text{\AA}$                       | 21.0090(2)                                             |
| $\alpha / ^\circ$                      | 90                                                     |
| $\beta / ^\circ$                       | 90                                                     |
| $\gamma / ^\circ$                      | 90                                                     |
| $V / \text{\AA}^3$                     | 5879.03(10)                                            |
| $Z$                                    | 2                                                      |

|                                                |                                                                   |
|------------------------------------------------|-------------------------------------------------------------------|
| $d_{\text{calc}}/\text{Mg}\cdot\text{m}^{-3}$  | 1.165                                                             |
| $\mu/\text{mm}^{-1}$                           | 0.711(CuK $\alpha$ )                                              |
| $F(000)$                                       | 2214..0                                                           |
| $2\theta$ range / °                            | 5.79 to 136.692                                                   |
| index ranges                                   | $-36 \leq h \leq 36$ , $-11 \leq k \leq 9$ , $-25 \leq l \leq 25$ |
| Reflections collected                          | 69482                                                             |
| independ.reflns ( $R_{\text{int}}$ )           | 10290 [ $R_{\text{int}} = 0.0618$ , $R_{\text{sigma}} = 0.0395$ ] |
| observed reflns                                | 10774                                                             |
| data/ restr./ param.                           | 10290/19/699                                                      |
| $R_1, wR_2 [I > 2\sigma(I)]$                   | $R_1 = 0.2354$ , $wR_2 = 0.4646$                                  |
| $R_1, wR_2$ (all data)                         | $R_1 = 0.2390$ , $wR_2 = 0.4708$                                  |
| GooF-of-fit on $F^2$                           | 1.060                                                             |
| largest diff. peak, hole/ $e\cdot\text{\AA}^3$ | 6.75/-0.76                                                        |
| Flack parameter                                | 0.53(3)                                                           |

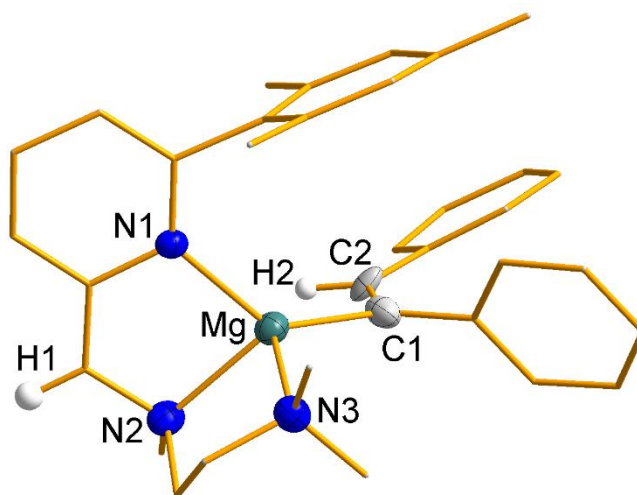

**Figure S29.** DIAMOND-rendered molecular structures of **3**. Relevant ellipsoids are set at 50% probability level while the rest of the skeleton is shown in sticks for clarity. H atoms except the dearomatized picolyl C-H and the alkenyl C-H are omitted for clarity. Unfortunately, the data collection could not be completed due to an icing issue at the time of data acquisition. But the structure and bond connectivity are confirmed from the existing data set as depicted above. We, however, refrain from reporting this to CCDC.

#### 4. DFT analyses.

Density Functional Theory (DFT) calculations were performed using M06-2X functional<sup>6</sup> as implemented in the Gaussian 16 package<sup>7</sup> The structures were optimized in the gas phase using the 6-31+G\*\*<sup>8</sup> basis set (B1) for all the atoms. This method is referred to as the M06-2X/B1 level of theory. Frequency calculations were done to characterize the stationary points as minima. Energy values were refined by single-point calculations using the def2-TZVPP<sup>9</sup> basis set (B2). The Fukui functions were calculated at M06-2X/B2//M06-2X/B1 level using the Multiwfn program.<sup>10</sup>

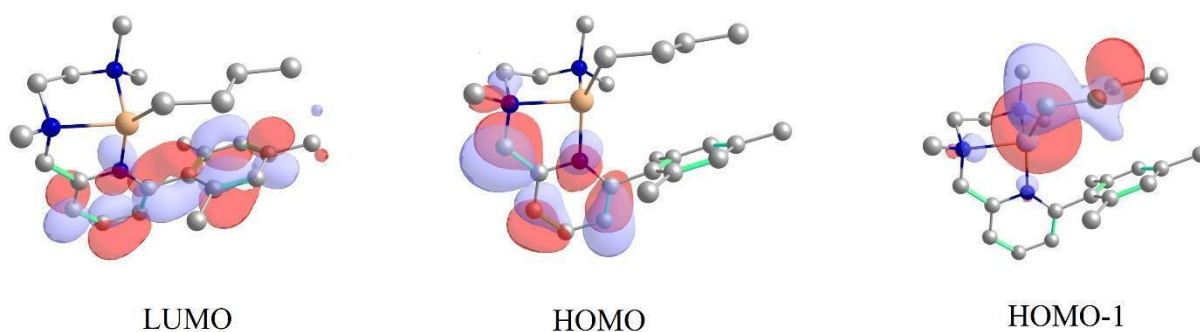

**Figure S30.** MOs of 1.

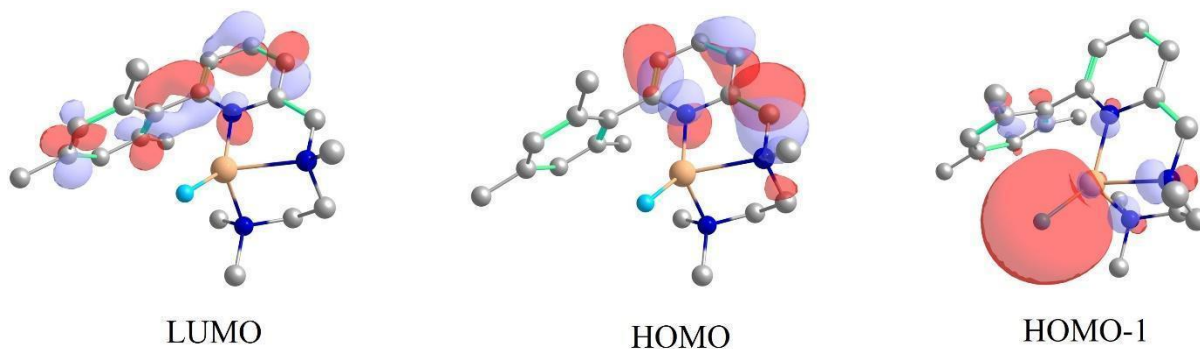

**Figure S31.** MOs of 2.

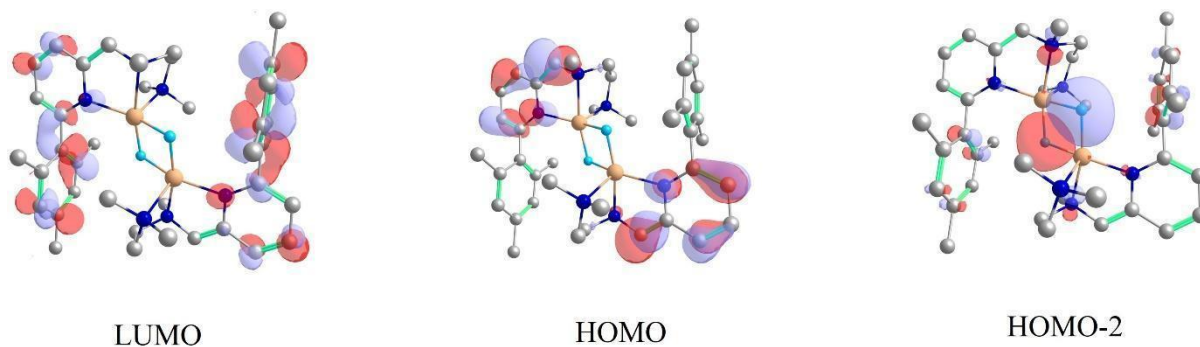

**Figure S32.** MOs of 2z.

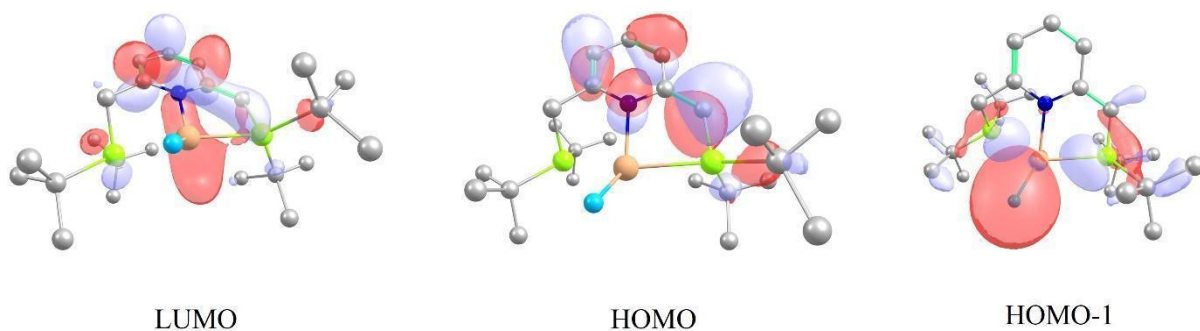

**Figure S33.** MOs of (PNP)MgH.

**Table S4.** Relative energies of the frontier Molecular Orbitals (FMOs) in eV

| FMO    | 1       | 2       | 2z      | (PNP)MgH |
|--------|---------|---------|---------|----------|
| LUMO   | 0.2061  | 0.2066  | 0.2058  | 0.2066   |
| HOMO   | 0       | 0       | 0       | 0        |
| HOMO-1 | -0.0548 | -0.0798 | -0.0003 | -0.0570  |
| HOMO-2 | -0.0924 | -0.0903 | -0.0768 | -0.0863  |

### The Fukui function analysis

#### Theoretical Background:

The Fukui functions are descriptors that help us to assign reactive sites in a molecule as either electrophilic or nucleophilic. It is expressed mathematically as follows

$$f(r) = [\partial\rho(r)/\partial N]_v$$

which simply means the change of electron density  $\rho(r)$  induced by the change of absolute electron number (N) with a fixed geometry and potential  $v$ .

For Nucleophilic attack it is defined as:  $f^+(r) = \rho_{N+1}(r) - \rho_N(r)$

For Electrophilic attack it is defined as:  $f^-(r) = \rho_N(r) - \rho_{N-1}(r)$

The dual descriptor is a much more accurate descriptor than the Fukui function in predicting the reactive sites of a molecule. It is also less affected by orbital contraction or dilatation than the Fukui function and seems more reasonable. With a finite difference approximation,  $f^{(2)}(r)$  can be described as

$$f^{(2)}(r) = Df(r) = f^+(r) - f^-(r)$$

$f^{(2)}(r) > 0$ , the reactive site for the nucleophilic attack.

$f^{(2)}(r) < 0$ , the reactive site for the electrophilic attack.

### Analysis

A positive value of  $f^+$  and  $f^-$  indicates that a site is reactive towards nucleophiles and electrophiles respectively (Whereas negative values have no meaning as such). Condensed Dual Descriptor (CDD) is defined as  $(f^+ - f^-)$ . CDD is positive if the site is electrophilic and is negative if the site is nucleophilic.

**Table S5. The condensed Fukui functions and dual descriptor (both in  $10^{-3}$  a.u.) based on Hirshfeld charges**

| Atom         | $f^+(r)$ | $f^-(r)$ | $f^{(2)}(r)$ |
|--------------|----------|----------|--------------|
| <b>1</b>     |          |          |              |
| Mg           | 14.9     | 3.2      | 11.8         |
| N2           | -0.1     | 5.5      | -5.6         |
| N3 (pyridyl) | 27.2     | 67.5     | -40.4        |
| N4           | -4.1     | -4.3     | 0.2          |
| C6 (picolyl) | 32.8     | 162.8    | -130.0       |



|                      |      |       |        |
|----------------------|------|-------|--------|
| C33 (butyl)          | 4.8  | 4.0   | 0.8    |
| <b>2</b>             |      |       |        |
| Mg                   | 28.4 | 12.2  | 16.2   |
| N2(pyridyl)          | 29.4 | 66.8  | -37.4  |
| N3                   | 0.3  | 5.3   | -4.9   |
| N4                   | -4.3 | -4.7  | 0.3    |
| C15 (picolyl)        | 35.2 | 163.7 | -128.5 |
| H53 (hydride)        | 17.6 | 21.6  | -4.0   |
| <b>(PNP)MgH</b>      |      |       |        |
| Mg                   | 98.1 | 12.9  | 85.2   |
| P1 (coordinated)     | 34.2 | 26.3  | 8.0    |
| P2 (non-coordinated) | 17.8 | 4.5   | 13.3   |
| N4 (pyridyl)         | 31.6 | 55.0  | -23.4  |
| C5 (picolyl)         | 20.3 | 158.5 | -138.1 |
| H70 (hydride)        | 22.6 | 19.8  | 2.8    |
| <b>2<sub>2</sub></b> |      |       |        |
| Mg1/Mg54             | 28.6 | 7.6   | 21.0   |
| N2/N55 (pyridyl)     | 3.0  | 32.3  | -29.3  |
| N3/N56               | -1.3 | 2.0   | -3.4   |
| N4/N57               | -2.1 | -3.4  | 1.2    |
| C15/C68 (picolyl)    | 8.7  | 74.3  | -65.6  |
| H53/H106 (hydride)   | 6.4  | 0.9   | 5.5    |

### Cartesian coordinates of the optimized structures

#### 1 (optimized geometry in gas phase)

E@B2 = -1301.126074 a.u.

12 -0.956865000 -0.901919000 -0.418439000

7 -3.133284000 -0.834482000 -0.610557000

7 -1.156221000 1.151498000 -0.341645000

7 -1.407723000 -1.405327000 1.681882000

|   |              |              |              |
|---|--------------|--------------|--------------|
| 6 | -2.488924000 | 1.530206000  | -0.499060000 |
| 6 | -3.466467000 | 0.574704000  | -0.620719000 |
| 1 | -4.514923000 | 0.837788000  | -0.745891000 |
| 6 | 1.901312000  | 1.665960000  | 1.122877000  |
| 6 | 1.843581000  | 1.027374000  | -1.230508000 |
| 6 | -3.637592000 | -1.514232000 | 0.601991000  |
| 1 | -3.547387000 | -2.597671000 | 0.456697000  |
| 1 | -4.703194000 | -1.287513000 | 0.756138000  |
| 6 | -0.188523000 | 2.096830000  | -0.226908000 |
| 6 | 1.207977000  | 1.575229000  | -0.098635000 |
| 6 | 3.165362000  | 0.588954000  | -1.120360000 |
| 1 | 3.661448000  | 0.190256000  | -2.003725000 |
| 6 | -1.796829000 | 3.864569000  | -0.394681000 |
| 1 | -2.033363000 | 4.925059000  | -0.415721000 |
| 6 | 3.866844000  | 0.659264000  | 0.082955000  |
| 6 | -0.439508000 | 3.446834000  | -0.244594000 |
| 1 | 0.373326000  | 4.157043000  | -0.153423000 |
| 6 | -2.792482000 | 2.948315000  | -0.517912000 |
| 1 | -3.827802000 | 3.251223000  | -0.638761000 |

|   |              |              |              |
|---|--------------|--------------|--------------|
| 6 | -2.839954000 | -1.062206000 | 1.817414000  |
| 1 | -2.918172000 | 0.027991000  | 1.884319000  |
| 1 | -3.252923000 | -1.498296000 | 2.740518000  |
| 6 | -3.616547000 | -1.515106000 | -1.822749000 |
| 1 | -3.201100000 | -1.011242000 | -2.697238000 |
| 1 | -4.714257000 | -1.480282000 | -1.885184000 |
| 1 | -3.287625000 | -2.559747000 | -1.823484000 |
| 6 | 3.211953000  | 1.188044000  | 1.195378000  |
| 1 | 3.745717000  | 1.259527000  | 2.142467000  |
| 6 | -0.046101000 | -2.477558000 | -1.520429000 |
| 1 | -0.476851000 | -3.410851000 | -1.112748000 |
| 1 | -0.414767000 | -2.436117000 | -2.557889000 |
| 6 | -0.597206000 | -0.586423000 | 2.592974000  |
| 1 | 0.464125000  | -0.805352000 | 2.435676000  |
| 1 | -0.853037000 | -0.786863000 | 3.644805000  |
| 1 | -0.770687000 | 0.467897000  | 2.370718000  |
| 6 | 1.300623000  | 2.312239000  | 2.350648000  |
| 1 | 1.731207000  | 3.307992000  | 2.502977000  |
| 1 | 1.520423000  | 1.720513000  | 3.245471000  |

|   |              |              |              |
|---|--------------|--------------|--------------|
| 1 | 0.221154000  | 2.442568000  | 2.264802000  |
| 6 | 1.141022000  | 0.948364000  | -2.565492000 |
| 1 | 0.528511000  | 0.041414000  | -2.641496000 |
| 1 | 1.872597000  | 0.915692000  | -3.376856000 |
| 1 | 0.481992000  | 1.807013000  | -2.719187000 |
| 6 | 1.480803000  | -2.619807000 | -1.533048000 |
| 1 | 1.804020000  | -3.548148000 | -2.033336000 |
| 1 | 1.932556000  | -1.800749000 | -2.112314000 |
| 6 | 5.304223000  | 0.213580000  | 0.183553000  |
| 1 | 5.664310000  | -0.180705000 | -0.769851000 |
| 1 | 5.422588000  | -0.570013000 | 0.938427000  |
| 1 | 5.950255000  | 1.049633000  | 0.469639000  |
| 6 | -1.171019000 | -2.829201000 | 1.955170000  |
| 1 | -1.718710000 | -3.452743000 | 1.245890000  |
| 1 | -1.481796000 | -3.086939000 | 2.979271000  |
| 1 | -0.107531000 | -3.044842000 | 1.836115000  |
| 6 | 2.103559000  | -2.601788000 | -0.137248000 |
| 1 | 1.905679000  | -1.623168000 | 0.331831000  |
| 1 | 1.606497000  | -3.361053000 | 0.483605000  |

|   |             |              |              |
|---|-------------|--------------|--------------|
| 6 | 3.606764000 | -2.868667000 | -0.146798000 |
| 1 | 3.820263000 | -3.875904000 | -0.520216000 |
| 1 | 4.045362000 | -2.778389000 | 0.852395000  |
| 1 | 4.117845000 | -2.156692000 | -0.803846000 |

## 2 (optimized geometry in gas phase)

E@B2 = -1143.883100 a.u.

|    |              |              |              |
|----|--------------|--------------|--------------|
| 12 | 0.884552000  | -0.838368000 | 0.932186000  |
| 7  | 0.639262000  | 1.029201000  | 0.103540000  |
| 7  | 3.004604000  | -0.313053000 | 0.813312000  |
| 7  | 1.323160000  | -2.032347000 | -0.851383000 |
| 6  | -2.466654000 | 0.311413000  | -1.072777000 |
| 6  | 1.862326000  | 1.672948000  | -0.067356000 |
| 6  | -1.747216000 | 0.836957000  | 0.014269000  |
| 6  | -0.520639000 | 1.661434000  | -0.213678000 |
| 6  | -3.555472000 | -0.530109000 | -0.821543000 |
| 1  | -4.105779000 | -0.943610000 | -1.665188000 |
| 6  | -3.956858000 | -0.846229000 | 0.474797000  |
| 6  | -2.153393000 | 0.552205000  | 1.334273000  |
| 6  | -3.250019000 | -0.284275000 | 1.539512000  |

|   |              |              |              |
|---|--------------|--------------|--------------|
| 1 | -3.559939000 | -0.502589000 | 2.560027000  |
| 6 | 3.028615000  | 1.023128000  | 0.251401000  |
| 1 | 4.001468000  | 1.497084000  | 0.138760000  |
| 6 | 1.844414000  | 3.024395000  | -0.593707000 |
| 1 | 2.791323000  | 3.537410000  | -0.729376000 |
| 6 | -1.443024000 | 1.145203000  | 2.528366000  |
| 1 | -0.706093000 | 0.441232000  | 2.933636000  |
| 1 | -0.927241000 | 2.073066000  | 2.271378000  |
| 1 | -2.161639000 | 1.354142000  | 3.325413000  |
| 6 | 3.580657000  | -1.316936000 | -0.108683000 |
| 1 | 4.562420000  | -0.982609000 | -0.475817000 |
| 1 | 3.735633000  | -2.249655000 | 0.446948000  |
| 6 | 2.646495000  | -1.539703000 | -1.290401000 |
| 1 | 3.095342000  | -2.237013000 | -2.015075000 |
| 1 | 2.495120000  | -0.575042000 | -1.786203000 |
| 6 | -0.575046000 | 2.940653000  | -0.707119000 |
| 1 | -1.527647000 | 3.400171000  | -0.940831000 |
| 6 | -5.124544000 | -1.765145000 | 0.732477000  |
| 1 | -5.622254000 | -2.044291000 | -0.199354000 |

|   |              |              |              |
|---|--------------|--------------|--------------|
| 1 | -4.795684000 | -2.683215000 | 1.229747000  |
| 1 | -5.863477000 | -1.287110000 | 1.382619000  |
| 6 | 0.663966000  | 3.626941000  | -0.895085000 |
| 1 | 0.661024000  | 4.642812000  | -1.281172000 |
| 6 | -2.123904000 | 0.647368000  | -2.506002000 |
| 1 | -1.086843000 | 0.967919000  | -2.619655000 |
| 1 | -2.306804000 | -0.212767000 | -3.157866000 |
| 1 | -2.750254000 | 1.471537000  | -2.865162000 |
| 6 | 3.693080000  | -0.359279000 | 2.114272000  |
| 1 | 3.229562000  | 0.368110000  | 2.782765000  |
| 1 | 3.600616000  | -1.357735000 | 2.553650000  |
| 1 | 4.758162000  | -0.107300000 | 2.005222000  |
| 6 | 0.318111000  | -1.805004000 | -1.898253000 |
| 1 | -0.666521000 | -2.116142000 | -1.535428000 |
| 1 | 0.279962000  | -0.738531000 | -2.128885000 |
| 1 | 0.559732000  | -2.369418000 | -2.811929000 |
| 6 | 1.361776000  | -3.458405000 | -0.498723000 |
| 1 | 2.070317000  | -3.632536000 | 0.313250000  |
| 1 | 0.375927000  | -3.767454000 | -0.144997000 |

1 1.648449000 -4.068454000 -1.368800000

1 0.335273000 -1.829563000 2.241558000

**2<sub>2</sub> (optimized geometry in gas phase)**

E@B2 = -2287.820692 a.u.

12 -1.312926000 0.534426000 -0.152258000

7 -2.992777000 1.090613000 0.952149000

7 -1.859801000 2.296560000 -1.320653000

7 -2.119250000 -0.490590000 -1.947029000

6 -2.526422000 -1.553795000 2.996514000

6 -3.777131000 1.920972000 0.141911000

6 -2.622530000 -0.156485000 3.030679000

6 -3.528138000 0.595477000 2.101266000

6 -1.743969000 -2.207825000 3.955764000

1 -1.671124000 -3.294106000 3.922596000

6 -1.048300000 -1.507695000 4.937567000

6 -1.927952000 0.571259000 4.017248000

6 -1.148781000 -0.113257000 4.949394000

1 -0.608114000 0.454309000 5.705935000

6 -3.244075000 2.504715000 -0.979249000



|   |              |              |              |
|---|--------------|--------------|--------------|
| 1 | -3.831068000 | 3.178604000  | -1.602021000 |
| 6 | -5.164691000 | 2.135187000  | 0.509345000  |
| 1 | -5.776291000 | 2.751442000  | -0.142592000 |
| 6 | -2.017519000 | 2.076999000  | 4.060203000  |
| 1 | -1.787836000 | 2.512084000  | 3.081279000  |
| 1 | -1.325423000 | 2.487168000  | 4.800048000  |
| 1 | -3.031740000 | 2.400416000  | 4.314857000  |
| 6 | -1.656544000 | 1.822158000  | -2.701049000 |
| 1 | -0.583390000 | 1.639527000  | -2.836561000 |
| 1 | -1.962820000 | 2.591354000  | -3.431024000 |
| 6 | -2.453308000 | 0.551361000  | -2.946367000 |
| 1 | -3.517349000 | 0.779992000  | -2.849742000 |
| 1 | -2.267486000 | 0.177733000  | -3.964641000 |
| 6 | -4.830468000 | 0.798080000  | 2.489542000  |
| 1 | -5.189406000 | 0.381507000  | 3.422969000  |
| 6 | -0.190748000 | -2.222022000 | 5.951900000  |
| 1 | -0.167698000 | -3.298018000 | 5.762220000  |
| 1 | -0.566604000 | -2.064463000 | 6.967824000  |
| 1 | 0.840086000  | -1.851648000 | 5.924230000  |

|   |              |              |              |
|---|--------------|--------------|--------------|
| 6 | -5.669261000 | 1.581521000  | 1.640601000  |
| 1 | -6.709188000 | 1.745432000  | 1.910395000  |
| 6 | -3.203922000 | -2.368220000 | 1.926021000  |
| 1 | -4.036394000 | -1.826148000 | 1.471300000  |
| 1 | -3.578285000 | -3.313330000 | 2.329205000  |
| 1 | -2.475388000 | -2.600644000 | 1.139402000  |
| 6 | -1.034907000 | 3.487832000  | -1.078057000 |
| 1 | -1.127523000 | 3.774501000  | -0.027348000 |
| 1 | -1.368974000 | 4.329908000  | -1.702357000 |
| 1 | 0.012591000  | 3.257623000  | -1.303398000 |
| 6 | -3.305143000 | -1.296131000 | -1.627784000 |
| 1 | -3.025027000 | -2.081990000 | -0.923459000 |
| 1 | -3.723639000 | -1.762693000 | -2.532657000 |
| 1 | -4.061951000 | -0.658107000 | -1.161467000 |
| 6 | -1.035602000 | -1.351525000 | -2.439326000 |
| 1 | -0.154280000 | -0.740783000 | -2.653272000 |
| 1 | -1.331458000 | -1.876529000 | -3.361433000 |
| 1 | -0.781068000 | -2.088150000 | -1.671551000 |
| 1 | -0.520161000 | -0.994686000 | 0.587957000  |

|    |             |              |              |
|----|-------------|--------------|--------------|
| 12 | 1.312926000 | -0.534426000 | 0.152258000  |
| 7  | 2.992777000 | -1.090613000 | -0.952149000 |
| 7  | 1.859801000 | -2.296560000 | 1.320653000  |
| 7  | 2.119250000 | 0.490590000  | 1.947029000  |
| 6  | 2.526422000 | 1.553795000  | -2.996514000 |
| 6  | 3.777131000 | -1.920972000 | -0.141911000 |
| 6  | 2.622530000 | 0.156485000  | -3.030679000 |
| 6  | 3.528138000 | -0.595477000 | -2.101266000 |
| 6  | 1.743969000 | 2.207825000  | -3.955764000 |
| 1  | 1.671124000 | 3.294106000  | -3.922596000 |
| 6  | 1.048300000 | 1.507695000  | -4.937567000 |
| 6  | 1.927952000 | -0.571259000 | -4.017248000 |
| 6  | 1.148781000 | 0.113257000  | -4.949394000 |
| 1  | 0.608114000 | -0.454309000 | -5.705935000 |
| 6  | 3.244075000 | -2.504715000 | 0.979249000  |
| 1  | 3.831068000 | -3.178604000 | 1.602021000  |
| 6  | 5.164691000 | -2.135187000 | -0.509345000 |
| 1  | 5.776291000 | -2.751442000 | 0.142592000  |
| 6  | 2.017519000 | -2.076999000 | -4.060203000 |

|   |              |              |              |
|---|--------------|--------------|--------------|
| 1 | 1.787836000  | -2.512084000 | -3.081279000 |
| 1 | 1.325423000  | -2.487168000 | -4.800048000 |
| 1 | 3.031740000  | -2.400416000 | -4.314857000 |
| 6 | 1.656544000  | -1.822158000 | 2.701049000  |
| 1 | 0.583390000  | -1.639527000 | 2.836561000  |
| 1 | 1.962820000  | -2.591354000 | 3.431024000  |
| 6 | 2.453308000  | -0.551361000 | 2.946367000  |
| 1 | 3.517349000  | -0.779992000 | 2.849742000  |
| 1 | 2.267486000  | -0.177733000 | 3.964641000  |
| 6 | 4.830468000  | -0.798080000 | -2.489542000 |
| 1 | 5.189406000  | -0.381507000 | -3.422969000 |
| 6 | 0.190748000  | 2.222022000  | -5.951900000 |
| 1 | 0.167698000  | 3.298018000  | -5.762220000 |
| 1 | 0.566604000  | 2.064463000  | -6.967824000 |
| 1 | -0.840086000 | 1.851648000  | -5.924230000 |
| 6 | 5.669261000  | -1.581521000 | -1.640601000 |
| 1 | 6.709188000  | -1.745432000 | -1.910395000 |
| 6 | 3.203922000  | 2.368220000  | -1.926021000 |
| 1 | 4.036394000  | 1.826148000  | -1.471300000 |

|   |              |              |              |
|---|--------------|--------------|--------------|
| 1 | 3.578285000  | 3.313330000  | -2.329205000 |
| 1 | 2.475388000  | 2.600644000  | -1.139402000 |
| 6 | 1.034907000  | -3.487832000 | 1.078057000  |
| 1 | 1.127523000  | -3.774501000 | 0.027348000  |
| 1 | 1.368974000  | -4.329908000 | 1.702357000  |
| 1 | -0.012591000 | -3.257623000 | 1.303398000  |
| 6 | 3.305143000  | 1.296131000  | 1.627784000  |
| 1 | 3.025027000  | 2.081990000  | 0.923459000  |
| 1 | 3.723639000  | 1.762693000  | 2.532657000  |
| 1 | 4.061951000  | 0.658107000  | 1.161467000  |
| 6 | 1.035602000  | 1.351525000  | 2.439326000  |
| 1 | 0.154280000  | 0.740783000  | 2.653272000  |
| 1 | 1.331458000  | 1.876529000  | 3.361433000  |
| 1 | 0.781068000  | 2.088150000  | 1.671551000  |
| 1 | 0.520161000  | 0.994686000  | -0.587957000 |

**(PNP)MgH (optimized geometry in gas phase)**

E@B2 = -1839.807201 a.u.

|    |              |              |              |
|----|--------------|--------------|--------------|
| 15 | -2.487094000 | -0.309013000 | -0.001291000 |
| 15 | 2.373433000  | -0.498915000 | -0.162347000 |

|    |              |              |              |
|----|--------------|--------------|--------------|
| 12 | -0.169546000 | -0.732528000 | -1.044980000 |
| 7  | 0.045972000  | 1.328999000  | -0.661742000 |
| 6  | -2.208616000 | 1.422107000  | 0.238656000  |
| 1  | -2.988256000 | 2.057799000  | 0.650347000  |
| 6  | -1.004154000 | 2.035557000  | -0.103523000 |
| 6  | -0.799694000 | 3.448077000  | 0.125963000  |
| 1  | -1.623224000 | 4.023081000  | 0.536561000  |
| 6  | 0.398090000  | 4.035850000  | -0.153257000 |
| 1  | 0.533825000  | 5.098686000  | 0.027426000  |
| 6  | 1.479871000  | 3.260981000  | -0.651960000 |
| 1  | 2.454721000  | 3.694184000  | -0.841804000 |
| 6  | 1.246153000  | 1.924103000  | -0.872593000 |
| 6  | 2.346578000  | 0.984780000  | -1.306516000 |
| 1  | 3.311237000  | 1.499134000  | -1.358433000 |
| 1  | 2.119804000  | 0.591493000  | -2.305143000 |
| 6  | -3.866996000 | -0.431719000 | -1.295605000 |
| 6  | -4.989946000 | 0.586642000  | -1.067604000 |
| 1  | -5.530241000 | 0.418121000  | -0.133008000 |
| 1  | -5.713965000 | 0.510481000  | -1.888826000 |

|   |              |              |              |
|---|--------------|--------------|--------------|
| 1 | -4.595090000 | 1.606530000  | -1.061394000 |
| 6 | -4.447384000 | -1.845714000 | -1.389726000 |
| 1 | -3.660337000 | -2.604431000 | -1.467709000 |
| 1 | -5.071050000 | -1.919097000 | -2.289221000 |
| 1 | -5.083100000 | -2.084896000 | -0.531926000 |
| 6 | -3.171910000 | -0.091881000 | -2.625314000 |
| 1 | -2.669544000 | 0.881193000  | -2.570913000 |
| 1 | -3.921792000 | -0.037929000 | -3.424200000 |
| 1 | -2.434605000 | -0.852090000 | -2.905896000 |
| 6 | -3.027661000 | -1.056605000 | 1.649417000  |
| 6 | -4.387409000 | -0.543524000 | 2.132501000  |
| 1 | -4.424494000 | 0.551131000  | 2.142621000  |
| 1 | -4.569234000 | -0.895093000 | 3.156047000  |
| 1 | -5.205237000 | -0.914374000 | 1.508143000  |
| 6 | -3.040068000 | -2.590369000 | 1.568275000  |
| 1 | -3.832580000 | -2.974361000 | 0.924292000  |
| 1 | -3.201165000 | -3.002322000 | 2.572400000  |
| 1 | -2.083616000 | -2.976249000 | 1.197973000  |
| 6 | -1.947742000 | -0.653517000 | 2.663005000  |

|   |              |              |              |
|---|--------------|--------------|--------------|
| 1 | -0.972204000 | -1.065430000 | 2.377769000  |
| 1 | -2.205175000 | -1.063272000 | 3.647260000  |
| 1 | -1.849299000 | 0.432536000  | 2.744049000  |
| 6 | 2.894255000  | 0.210708000  | 1.514200000  |
| 6 | 1.653073000  | 0.868756000  | 2.149174000  |
| 1 | 1.353231000  | 1.784152000  | 1.633892000  |
| 1 | 1.894196000  | 1.132365000  | 3.186445000  |
| 1 | 0.794912000  | 0.191071000  | 2.164265000  |
| 6 | 4.008146000  | 1.262302000  | 1.441475000  |
| 1 | 4.937863000  | 0.869293000  | 1.026158000  |
| 1 | 4.221673000  | 1.620229000  | 2.456469000  |
| 1 | 3.695859000  | 2.129307000  | 0.851735000  |
| 6 | 3.320410000  | -0.949542000 | 2.426210000  |
| 1 | 2.546752000  | -1.724129000 | 2.480448000  |
| 1 | 3.475726000  | -0.563109000 | 3.440328000  |
| 1 | 4.255523000  | -1.415609000 | 2.105940000  |
| 6 | 3.721556000  | -1.603649000 | -0.895033000 |
| 6 | 5.161343000  | -1.130689000 | -0.668887000 |
| 1 | 5.315467000  | -0.110186000 | -1.034989000 |



|   |             |              |              |
|---|-------------|--------------|--------------|
| 1 | 5.839557000 | -1.787373000 | -1.227968000 |
| 1 | 5.459458000 | -1.171050000 | 0.381832000  |
| 6 | 3.471088000 | -1.680268000 | -2.412756000 |
| 1 | 2.423291000 | -1.893016000 | -2.649806000 |
| 1 | 4.085387000 | -2.489952000 | -2.824281000 |
| 1 | 3.766919000 | -0.756390000 | -2.918797000 |
| 6 | 3.529660000 | -3.017467000 | -0.320468000 |
| 1 | 3.666402000 | -3.055974000 | 0.762870000  |
| 1 | 4.265435000 | -3.692741000 | -0.773530000 |
| 1 | 2.531057000 | -3.399332000 | -0.556061000 |
| 1 | 0.071723000 | -1.705624000 | -2.458648000 |

## 5. References.

1. Sheldrick, G., SHELXT - Integrated space-group and crystal-structure determination. *Acta Crystallogr., Sect. A: Found. Adv.* **2015**, *71*, 3-8.
2. Sheldrick, G., Crystal structure refinement with SHELXL. *Acta Crystallogr., Sect. C: Struct. Chem.* **2015**, *71*, 3-8.
3. Dolomanov, O. V.; Bourhis, L. J.; Gildea, R. J.; Howard, J. A. K.; Puschmann, H., OLEX2: a complete structure solution, refinement and analysis program. *J. Appl. Crystallogr.* **2009**, *42*, 339-341.
4. Spek, A., Single-crystal structure validation with the program PLATON. *J. Appl. Crystallogr.* **2003**, *36*, 7-13.
5. K. Brandenburg, Diamond Version 4.6.0, Crystal Impact GbR, Bonn, 2019.
6. Zhao, Y.; Truhlar, D. G., The M06 suite of density functionals for main group thermochemistry, thermochemical kinetics, noncovalent interactions, excited states, and transition elements: two new functionals and systematic testing of four M06-class functionals and 12 other functionals. *Theor. Chem. Acc.* **2008**, *120*, 215-241.
7. [https://gaussian.com/dl/g16\\_c01.enw](https://gaussian.com/dl/g16_c01.enw).
8. (a) Gordon, M. S.; Binkley, J. S.; Pople, J. A.; Pietro, W. J.; Hehre, W. J., Self-consistent molecular-orbital methods. 22. Small split-valence basis sets for second-row elements. *J. Am. Chem. Soc.* **1982**, *104*, 2797-2803; (b) Spitznagel, G. W.; Clark, T.; von Ragué Schleyer, P.; Hehre, W. J., An evaluation of the performance of diffuse function-augmented basis sets for second row elements, Na-Cl. *Journal of Computational Chemistry* **1987**, *8*, 1109-1116.

9. Weigend, F.; Ahlrichs, R., Balanced basis sets of split valence, triple zeta valence and quadruple zeta valence quality for H to Rn: Design and assessment of accuracy. *Physical Chemistry Chemical Physics* **2005**, *7*, 3297-3305.
10. Lu, T.; Chen, F., Multiwfn: a multifunctional wavefunction analyzer. *J. Comput. Chem.* **2012**, *33*, 580-92.
